1 **Resolving isomeric posttranslational modifications using a nanopore**

2

3 Tobias Ensslen<sup>1</sup>, Kumar Sarthak<sup>2</sup>, Aleksei Aksimentiev<sup>2</sup> and Jan C. Behrends<sup>1,3</sup>

4 <sup>1</sup>Laboratory for Membrane Physiology and Technology, Department of Physiology, Faculty of Medicine,  
5 University of Freiburg, Freiburg, Germany; <sup>2</sup>Center for Biophysics and Quantitative Biology and  
6 Department of Physics, University of Illinois at Urbana-Champaign, Urbana, IL 61801, USA, <sup>3</sup>Freiburg  
7 Centre for Materials Research, University of Freiburg, Freiburg, Germany.

8

9 **Posttranslational modifications (PTMs) of proteins are crucial for cellular function but pose analytical**  
10 **problems, especially in distinguishing chemically identical PTMs at different nearby locations within the**  
11 **same protein. Current methods, such as liquid chromatography-tandem mass spectrometry, are**  
12 **technically tantamount to *de novo* protein sequencing<sup>1</sup>. Nanopore techniques may provide a more**  
13 **efficient solution, but applying the concepts of nanopore DNA strand sequencing to proteins still faces**  
14 **fundamental problems<sup>2-4</sup>. Here, we demonstrate the use of an engineered biological nanopore to**  
15 **differentiate positional isomers resulting from acetylation or methylation of histone protein H4, an**  
16 **important PTM target<sup>5,6</sup>. In contrast to strand sequencing, we differentiate positional isomers by**  
17 **recording ionic current modulations resulting from the stochastic entrapment of entire peptides in the**  
18 **pore's sensing zone, with all residues simultaneously contributing to the electrical signal. Molecular**  
19 **dynamics simulations show that, in this whole-molecule sensing mode, the non-uniform distribution of**  
20 **the electric potential within the nanopore makes the added resistance contributed by a PTM dependent**  
21 **on its precise location on the peptide. Optimization of the pore's sensitivity in combination with parallel**  
22 **recording and automated and standardized protein fragmentation may thus provide a simple, label-**  
23 **free, high-throughput analytical platform for identification and quantification of PTMs.**

24

25 Bacterial pore-forming proteins reconstituted in synthetic lipid membranes have been used as electrical  
26 molecular sensors in a variety of tasks<sup>7,8</sup>. Sequencing of DNA with biological pores, in particular, has  
27 become an established technique<sup>9–11</sup>. Generally, in molecular sensing by nanopores, the modulation of a  
28 nanopore's ionic conductance by a single molecule is used to infer that molecule's identity or sequence.  
29 Sequencing by nanopores, as currently done, is based on enzymatically controlled threading of a stretched  
30 polymer (DNA or RNA) through pores with short dominant constrictions (MspA, CsgG), so that the partial  
31 block of the ionic current is determined by a few monomers (bases) only. By contrast, in whole molecule  
32 sensing, all segments of a molecule are simultaneously present within the nanopore and contribute to the  
33 current block, which enables the use of a nanopore as a single molecule size spectrometer<sup>12–19</sup>. Recently,  
34 the pore formed by the protein toxin aerolysin (AeL) of *Aeromonas hydrophila* was used in this way for  
35 high-resolution discrimination of oligo-PEGs<sup>20</sup>, short oligonucleotides<sup>21</sup> and oligopeptides<sup>22–24</sup>.

36 Harnessing of nanopore technology for applications in proteomics has been an active area of research for  
37 some time<sup>2,25</sup>, including the detection of PTMs<sup>26–29</sup>. Sequencing proteins by nanopore threading, which  
38 would in principle allow detection of PTMs in a site-specific manner, is presently in early stages of  
39 development, but still faces the lack of processive motors suitable for moving a polypeptide chain through  
40 the nanopore and of physical mechanisms for keeping an unevenly charged peptide taut through the  
41 nanopore's constriction<sup>3,4,25,30</sup>. Here we show that site-specific detection of histone PTMs is feasible by  
42 whole-molecule nanopore sensing of peptide fragments, requiring neither sequential threading nor  
43 uniform charge of the analyte. In contrast to recent work using engineered electrostatic interactions to  
44 discriminate phosphoserine and phosphothreonine residues<sup>27</sup>, our strategy is not limited to charge-  
45 conferring modifications and is capable of differentiating true positional isomers. Furthermore, our all-  
46 atom molecular dynamics (MD) simulations<sup>31,32</sup> show that the ability to determine the sites of chemically  
47 identical modifications originates from an analyte-induced modulation of the nonuniform electric field  
48 inside the nanopore, suggesting a universal approach for electrical sensing of molecular shape.

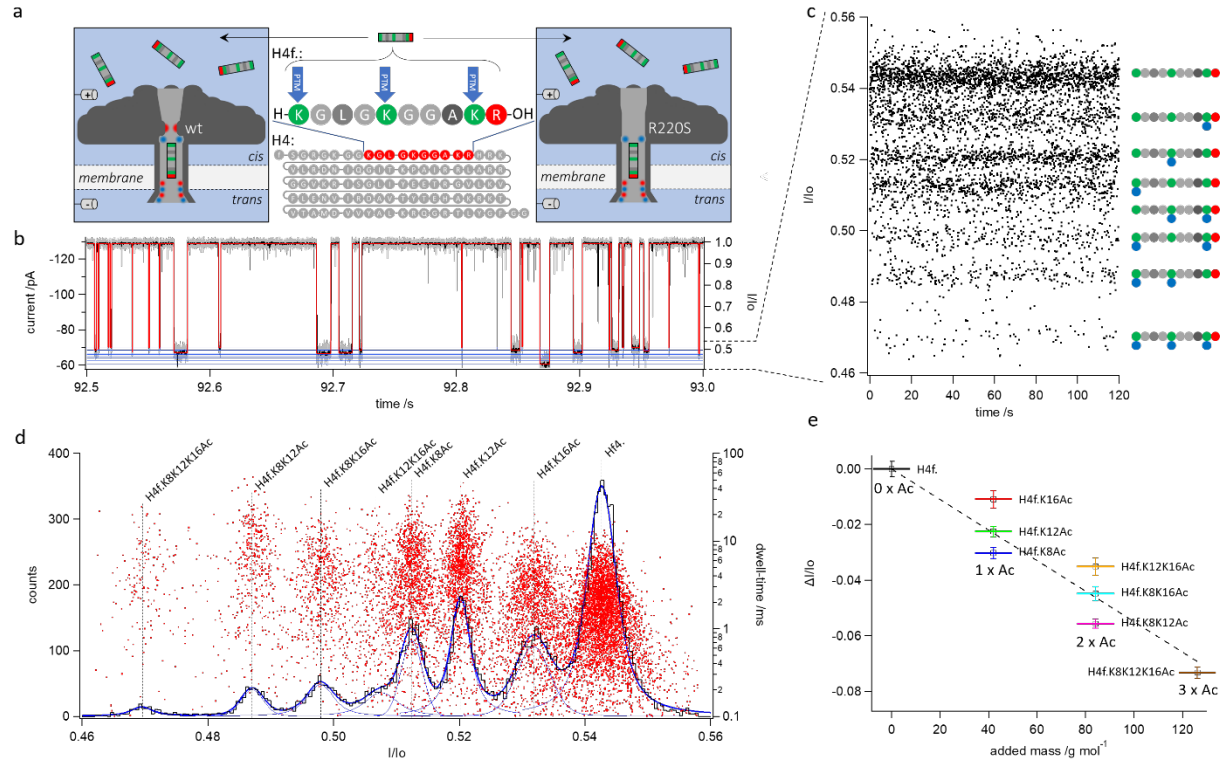

49

50 **Fig. 1 | Discrimination of acetylation-derived positional isomers with the R220S mutant of the aerolysin pore.** **a**, Experimental  
 51 set-up and peptide constructs used. Left: schematic representation of the wt-AeL pore reconstituted in a lipid bilayer membrane  
 52 with the bulky, positively charged arginine in position 220 (R220) as part of the cis-side constriction. Center: Schematic of the full  
 53 length human H4 protein, and the fragment (H4f.) used in this study. Blue arrows indicate the positions of the three lysins (K8, K12,  
 54 K16) susceptible to posttranslational modification by acetylation or methylation. Right: the mutant aerolysin pore in which R220  
 55 was replaced by a serine, neutralizing the charge and reducing the extent of the constriction. In both representations of the pore,  
 56 a peptide is schematically shown residing in the main beta-barrel, the presumptive sensing region. **b**, Half-a-second current trace  
 57 of an experiment recorded using the R220S pore in the simultaneous presence of H4f, H4f.K8Ac, H4f.K12Ac, H4f.K16Ac,  
 58 H4f.K8K12Ac, H4f.K8K16Ac, H4f.K12K16Ac and H4f.K8K12K16Ac and digitally postfiltered at 25 kHz (grey) or 2.5 kHz (black) 3 dB  
 59 cut-off frequency (see Methods). Red trace indicates the output of the detection algorithm (see methods); blue lines indicate  
 60 the means of 8 preferred current amplitudes in the blocked state corresponding to the 8 peptoforms. Left y-axis indicates the absolute  
 61 current (pA), right y-axis shows blocked state current normalized by open pore current ( $I/I_0$ ); **c**: scatterplot of  $I/I_0$  values against  
 62 time over 2 min of recording. Note the concentration of data points around 8 distinct levels which can be assigned to the various  
 63 peptoforms (right) by sequential addition (Extended Data Fig. 2). **d**, Black cityscape: histogram of  $I/I_0$  levels from the experiment  
 64 shown in b, c, fitted with the sum (thick blue line) of 8 Voigt peaks<sup>31</sup> (thin blue lines) corresponding to each probability maximum.  
 65 Red dots: superimposed scatterplot of resistive pulse dwell-time vs.  $I/I_0$  value. **e**, Shift of maxima in d with respect to the unmodified  
 66 H4f-peptide (black) plotted against mass added by acetylations. Error bars give full width at half maximum of Voigt peaks. Note  
 67 that despite a linear overall dependence of  $I/I_0$  on mass, the maxima corresponding to peptoforms of identical mass are clearly  
 68 separated.

69 For our proof-of-principle experiments, we chose a decapeptide sequence occurring near the N-terminus  
 70 of histone protein 4, H4 (K8-R17) (**Fig. 1a**). This protein fragment, H4f., contains three lysine residues (K8,  
 71 K12, K16) at which acetylation has important functional consequences for gene expression<sup>32,33</sup>. We chose  
 72 the sequence to include, in particular, lysine K16, as its acetylation was recently found to be important for  
 73 human development<sup>34</sup>, as well as to be an intergenerational gene activation signal in *Drosophila*<sup>35</sup>. We  
 74 chose the sequence to be shorter than the common N-terminal tryptic fragment H4(G4-R17) to be

75 commensurate with the length of peptides known to provide good size resolution with the aerolysin  
76 pore<sup>22,23</sup>.

77 A major consideration for whole-molecule sensing is the dwell-time of the analyte in the nanopore. In the  
78 presence of noise, longer current blocks give more precise estimation of the relative residual current and  
79 thereby, enhance resolution of subtle differences between analyte molecules<sup>8,20,23</sup> and site-directed  
80 mutagenesis of presumptive pore-lining residues can be used to prolong analyte interaction with biological  
81 nanopores<sup>28,36–38</sup>. On the other hand, measurement error decreases only with the square root of dwell-  
82 times and saturation of the pore may become an issue. In exploratory experiments using arginine-based  
83 peptides, we identified a novel functional aerolysin mutant, R220S, in which the dwell-times are  
84 approximately doubled with respect to the wild-type and which enhanced differentiation of peptides  
85 containing single amino acid substitutions (**Extended Data Fig. 1**). We, therefore, used the R220S mutant  
86 for the task of differentiating positional peptide isomers.

87 **Fig. 1** reports results from a typical recording using the R220S aerolysin mutant in the presence of all seven  
88 peptide variants (peptoforms), resulting from acetylation of either one, two or all three lysine residues K8,  
89 K12 and/or K16 (H4f.K8Ac, H4f.K12Ac, H4f.K16Ac, H4f.K8K12Ac, H4f.K8K16Ac, H4f.K12K16Ac and  
90 H4f.K8K12K16Ac), as well as the unmodified fragment Hf4. As shown in **Fig. 1b**, the open pore current of  
91 approximately -130 pA at a driving force of -60 mV is, at irregular intervals, interrupted by blocks that reach  
92 various, reduced current levels which are situated around 50 % of the open pore current  $I_o$  (right axis:  
93 relative residual current  $I/I_o \cong 0.5$ ). A plot of the computed event-averaged mean current values of these  
94 blocks vs. time (**Fig. 1c**) reveals them to be concentrated at eight preferred relative residual current values.  
95 A histogram showing the corresponding probability maxima is shown in **Fig. 1d**. These levels were  
96 unequivocally assigned to each species by sequential addition of the peptoforms (see **Extended Data Fig.**  
97 **2**). Surprisingly, as also shown by the multi-Voigt peak fits<sup>31</sup> in **Fig. 1d** and **Extended Data Fig. 2**, there is  
98 good to excellent separation between the maxima corresponding to the positional isomers for single  
99 acetylation (H4f.K16Ac, H4f.K12Ac, H4f.K8Ac) and double acetylation (H4f.K12K16Ac, H4f.K8K16Ac,  
100 H4f.K8K12Ac). As expected, the sequence of  $I/I_o$ -values follows mass, or more likely global volume<sup>8,23</sup>, so  
101 that increased overall acetylation induces a shift towards deeper blocks. Indeed, a plot of the shift of the  
102 mean relative residual current value ( $\Delta I/I_o$ ) with respect to unmodified H4f. vs. the mass added by  
103 acetylation shows an overall linear relationship (**Fig. 1e**). However, the peptoforms of equal mass  
104 (positional isomers) are well separated from each other (**Fig. 1e**), with acetylations towards the N-terminus  
105 providing deeper blocks (**Extended Data Fig. 3a, b**). Note the reduction of peak area with increased

106 acetylation due to neutralization of the positive charges of the lysines and the resulting weakening of  
107 electrophoretic force on the analyte (Extended Data Fig. 3c).

108 The clear separation between the population maxima is mainly possible because all peptoforms induce  
109 blocks with characteristic dwell-times well above 1 ms in the R220S variant (see scatterplot in **Fig. 1d** and  
110 **Extended Data Fig. 3d** and **Extended Data Fig. 4**), with acetylation propitiously increasing these values,  
111 thus allowing efficient reduction in measurement error by digital averaging for all species. This contrasts  
112 with the wild type aerolysin pore, where acetylation induces a strong reduction in dwell-times to well  
113 below 1 ms (Extended Data Fig. 5 - **Extended Data Fig. 8**). As evidenced by sequential addition  
114 experiments, the different peptoforms block the ionic current to unique levels also in the wild-type pore,  
115 and also in the same sequence. However, the measurement error due to shorter dwell-times produces  
116 considerable overlap between the  $I/I_0$ -probability maxima for peptoforms of equal mass (Extended Data  
117 Fig. 6, Extended Data Fig. 8a, b).

118 In essence, our findings show that, in both wild type and mutant pores, chemical modifications of residues  
119 affect the residual current in a manner dependent on the position of the modification in the peptide chain.  
120 This result opens a range of new possibilities for the use of nanopores in probing the structure of single  
121 molecules and would not be predicted in the framework of the constant field assumption for ion  
122 transport<sup>39</sup>.

123 To determine the molecular mechanism enabling the site-selective differentiation of PTMs, we used the  
124 steered MD (SMD) protocol<sup>40,41</sup> to pull an H4f.K8Ac peptide through the transmembrane pore of the  
125 aerolysin variant R220S (**Fig. 2a**). The sequence of microscopic conformations generated by the SMD run  
126 was analyzed using the steric exclusion model (SEM)<sup>42</sup> to determine the relative residual current ( $I/I_0$ ) as  
127 a function of the peptide's location within the pore, **Fig. 2b**. The residual current has its highest value close  
128 to 1.0 as the peptide enters the pore from the *cis*-side and the lowest value of 0.1 as it passes through the  
129 *trans*-side constriction of aerolysin. Starting from the ensemble of conformations generated by pulling the  
130 H4f.K8Ac peptide, we obtained conformational ensembles for H4f., singly (H4f.K8Ac, H4f.K12Ac,  
131 H4f.K16Ac), doubly (H4f.K8K12Ac, H4f.K8K16Ac, H4f.K12K16Ac) and triply (H4f.K8K12K16Ac) acetylated  
132 peptides by computationally mutating the side chains of the respective acetylated residues<sup>23</sup>. Repeating  
133 the SEM calculations for the modified peptides produced seven additional profiles of the relative residual  
134 current, **Fig. 2b**, all of which appear to be nearly indistinguishable from that of H4f.K8Ac, except in certain  
135 regions of the pore. The average simulated residual current of all eight peptides, **Fig. 2c**, was found to be  
136 in good agreement with the experimental values when the currents were averaged over the complete  
137 sensing volume of wt-AeL<sup>23</sup>, or over the region where the deviations were observed (**Extended Data Fig.**

138 9). From repeated SMD simulations we learned, however, that the sequence of blockade level's ordering  
139 does depend on the global conformation of the peptides, in particular on the global orientation of the  
140 peptide with respect to the nanopore (see **Extended Data Fig. 10** and **Extended Data Fig. 11**).

141 Having established a computational model that reproduces experimentally measured differences in the  
142 blockade current, we identified the molecular mechanism that enables site-specific determination of  
143 PTMs. Whereas a current difference produced by either acetylation or deacetylation is expected, as such  
144 a modification changes the overall volume excluded by the peptide from the conductive volume of the  
145 nanopore, the transfer of the same modification from one site to another does not alter the excluded  
146 volume and thus any effect on pore conductance requires a more detailed examination. To this end, we  
147 compared the local density of transmembrane ionic current (the current's z component) in the nanopore  
148 blocked by either H4f.K8Ac or H4f.K16Ac peptides, which molecular configurations differ only by the site  
149 of acetylation, **Fig. 2d** (see Extended Data Fig. 12 for similar analysis of another peptide conformation from  
150 the same MD trajectory). The local current density map, **Fig. 2e**, shows low currents in the regions occupied  
151 by the N-terminus of the peptide (i.e., around  $z=22$  Å, residue 8 and 9) and high currents in the parts of  
152 the nanopore devoid of the peptide atoms (i.e., around  $z=6$  Å, residues 15-17). The electrostatic potential  
153 profile computed for the two peptide conformations, **Fig. 2f**, reveals that the sharpest drop of the potential  
154 occurs in the vicinity of residue K8, and that acetylation of that residue considerably increases resistance  
155 of the adjacent nanopore volume (**Fig. 2f**, dashed lines). In contrast, acetylation of residue K16 introduces  
156 negligible changes to the local nanopore resistance. This is in line with the experimental finding which  
157 shows a deepening of the block of the pore as the lysines towards the N-terminus of the peptide are  
158 acetylated (Extended Data Fig. 3b). Thus, our analysis points to a microscopic mechanism where a  
159 peptide's confinement within the nanopore creates a conductive volume of a highly non-uniform shape.  
160 Because of this non-uniform shape, a local change of the volume's cross section due to a PTM can alter  
161 the overall conductance of the nanopore by an amount that depends on the location of the PTM within  
162 the conductive volume, similar to an effect produced by placing a boulder in either rapids or a backwater  
163 section of a mountain stream, **Fig. 2g**.

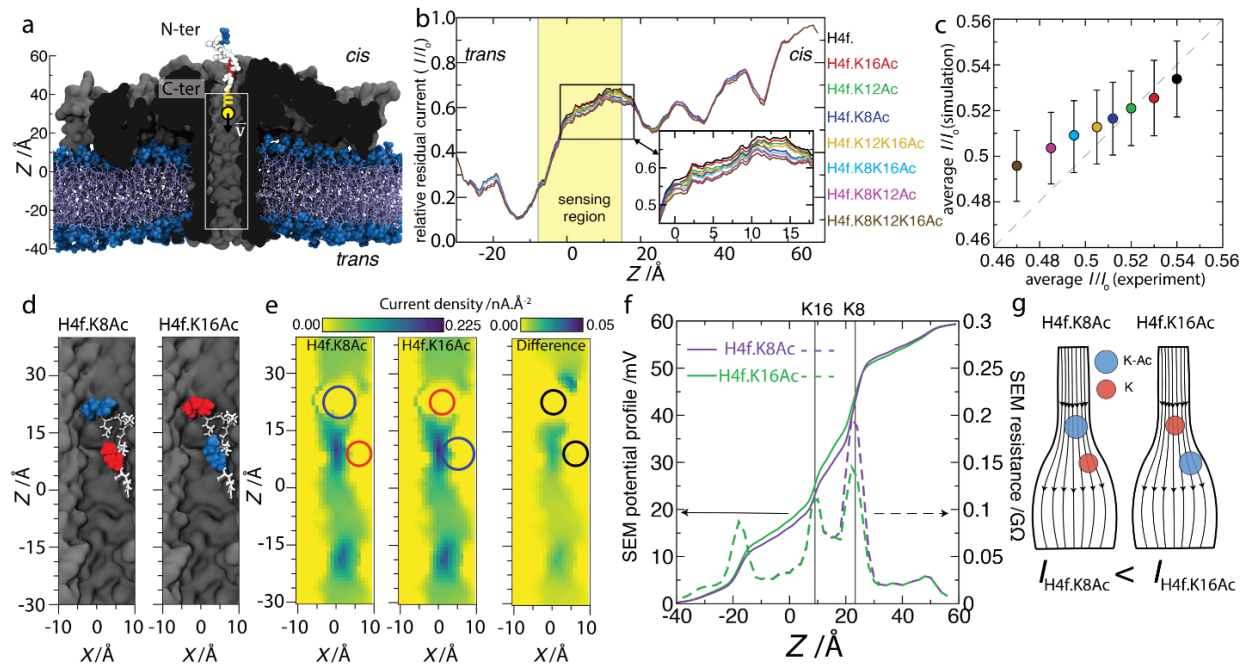

164

165 **Fig. 2 | Microscopic mechanism of site-selective PTM detection.** **a**, Initial state of a 100 ns steered MD simulation where an  
 166 H4f.K8Ac peptide (vdw spheres) is pulled by a harmonic spring with a constant velocity of 1 Å/ns through an aerolysin nanopore  
 167 (cutaway molecular surface), embedded in a lipid membrane (blue) and submerged in 2 M KCl electrolyte (not shown). The C-  
 168 terminus of the peptide is oriented towards the trans-side of the membrane. The white rectangle indicates the location of the  
 169 nanopore volume shown in panels d and e. **b**, Relative residual current versus center of mass z coordinate of the acetylated H4f.  
 170 peptides. The coordinate axis is defined in panel a. The currents were computed using SEM<sup>42</sup> and running-averaged with a 5 Å  
 171 window. The highlighted region shows the sensing volume ( $-9 \text{ \AA} < z < 15 \text{ \AA}$ ) of the wt-AeL pore<sup>23</sup>. The inset shows a zoomed-in view  
 172 of the main plot. **c**, Simulated vs. experimental average relative currents produced by the acetylated peptides within the sensing  
 173 region of aerolysin. Colors represent peptide variants as defined in panel b. The error bars show the standard error calculated using  
 174 100 current values from the sensing region of the nanopore. **d**, Representative conformation of the H4f.K8Ac peptide in the sensing  
 175 region of the nanopore and the corresponding computational model of the H4f.K16Ac peptide. The peptide residues are drawn as  
 176 white sticks except residues K8 and K16, which are shown as vdW spheres colored according to their acetylation state: acetylated  
 177 (blue) and unmodified (red). **e**, local density of transmembrane ion current (its z component) near the H4f.K8Ac (left) and H4f.K16Ac  
 178 (center) peptides and their difference (H4f.K16Ac-H4f.K8Ac, right). The currents were computed using SEM over a 1 Å grid. The  
 179 heat map shows a cross section of the nanopore volume along the pore axis. The circles indicate the approximate locations of the  
 180 K8 and K16 residues. **f**, Electrostatic potential along the nanopore axis for the H4f.K8Ac (purple) and H4f.K16Ac (green) peptide  
 181 systems (solid lines, left axis) and local resistance of the nanopore volume (dashed lines, right axis). The local resistance was  
 182 computed from the local electrostatic potential using 4 Å segments. **g**, Schematics illustrating the microscopic mechanism enabling  
 183 site-specific PTM detection via a blockade current measurement. The blue and red balls represent acetylated and unmodified lysine  
 184 residues, respectively.

185

186 To determine whether our result can, in principle, be generalized to other PTMs of histone proteins, we  
 187 attempted to analyze site-selective mono- and trimethylation of lysines K8, K12 and K16 using the R220S  
 188 mutant aerolysin pore. In order to allow direct comparison with the acetylation results, we used the same  
 189 H4f. as above, despite the fact that K20, rather than K8, K12 and K16, is reported to be a known H4  
 190 methylation target<sup>43,44</sup>.

191 As shown in **Fig. 3a**, clearly different maxima were apparent in the relative residual current ( $I/I_0$ ) histogram  
192 for nonmethylated and singly, doubly and triply monomethylated forms of H4f. As in the case of  
193 acetylation, successive monomethylation at one, two or three residues resulted in a progressive shift of  
194 the  $I/I_0$ -maxima towards deeper blocked levels that was linearly related to added mass (**Fig. 3d**). In keeping  
195 within the smaller added mass of methylation (14 g/mol) vs. acetylation (42 g/mol), the total shift by triple  
196 monomethylation was less than that by triple acetylation; however, the steepness of the relationship  
197 between the shift of  $\Delta I/I_0$  and the added mass was higher for methylation than for acetylation. While the  
198 histogram in **Fig. 3a** shows no obvious separation between the maxima for the positional isomers  
199 H4f.K8me, H4f.K12me, H4f.K16me or H4f.K8K12me, H4f.K8K16me, H4f.K12K16me, it became evident in  
200 sequential addition experiments that each species contributed a population of resistive pulses with a  
201 characteristic mean relative current  $I/I_0$ .

202 As shown in **Fig. 3b**, equimolar addition of H4f.K12me to the *cis*-compartment already containing  
203 H4f.K8me not only made the blockade events more frequent, but also broadened the  $I/I_0$ -distribution and  
204 shifted its maximum towards a smaller value. A similar trend was observed when H4f.K16me was added  
205 to a *cis*-compartment containing H4f.K8me and H4f.K12me. In both cases, this shift and broadening could  
206 be accounted for by the contribution of an additional population, characterized by a slightly shifted mean,  
207 as shown by the Voigt fits in **Fig. 3b** and **Extended Data Fig. 15a-c**. Different population maxima could also  
208 be determined by sequential addition of H4f.K8K12me, H4f.K8K16me and H4f.K12K16me (**Fig. 3c** and  
209 **Extended Data Fig. 15d-f**).

210 We note that, while not allowing for single-passage identification, as for acetylation, the site-specific  
211 sensitivity of the mutant pore for monomethylation is sufficient to allow for a quantitative analysis of  
212 methylated peptoforms, as shown above, given appropriate calibration of on-rates to correct for the loss  
213 of electrophoretic susceptibility.

214 The study of lysine trimethylation of H4f. suggests that relative abundance of isomer populations can not  
215 only be discerned from the blockade levels ( $I/I_0$ ) but also from the analysis of the dwell-time distributions.  
216 The positional isomers H4f.K8me<sub>3</sub> and H4f.K12me<sub>3</sub> could not be *prima facie* distinguished on the basis of  
217 the  $I/I_0$ -distributions in the presence of all seven species but H4f.K16me<sub>3</sub> showed a clearly distinct  
218 maximum that was shifted towards lower residual currents. Conversely, the maxima for doubly  
219 trimethylated H4f.K8K12me<sub>3</sub> and H4f.K12K16me<sub>3</sub> were lumped together in one peak, while H4f.K8K16me<sub>3</sub>  
220 produced a distinct peak, shifted towards higher residual current levels (**Fig. 3**, **Extended Data Fig. 16**). As  
221 before, closer analysis of sequential addition experiments revealed a small shift in the population mean  
222 upon adding H4f.K12me<sub>3</sub> to H4f.K8me<sub>3</sub> or H4f.K12K16me<sub>3</sub> to H4f.K8K12me<sub>3</sub>, which enabled the use of the



223 fitting procedure previously shown for monomethylation to extract separate I/Io values for the two  
 224 overlapping species (**Fig. 3f, g** and **Extended Data Fig. 18**). Furthermore, by addition of H4f.K12me<sub>3</sub> to  
 225 H4f.K8me<sub>3</sub> or H4f.K12K16me<sub>3</sub> to H4f.K8K12me<sub>3</sub> the monoexponential distribution of event dwell-times  
 226 contained in the maximum ( $\tau \approx 2$  and 5 ms, respectively) was converted into a double-exponential  
 227 distribution due to the appearance of a second exponential population with longer dwell-times ( $\tau' \approx 5$  and  
 228 10 ms, respectively, **Fig. 3f, g inset** and **Extended Data Fig. 17**). The relative weights of the two exponential  
 229 components may, therefore, also be used to estimate the relative abundance of these isomeric  
 230 peptofoms following appropriate correction for on-rates. Again, we found an overall linear relationship  
 231 between the shift in I/Io, added mass and the steepness for the relation for trimethylation was  
 232 indistinguishable from that for acetylation. Synthesis of triply trimethylated H4f. was attempted at two  
 233 commercial sources, but failed.

234

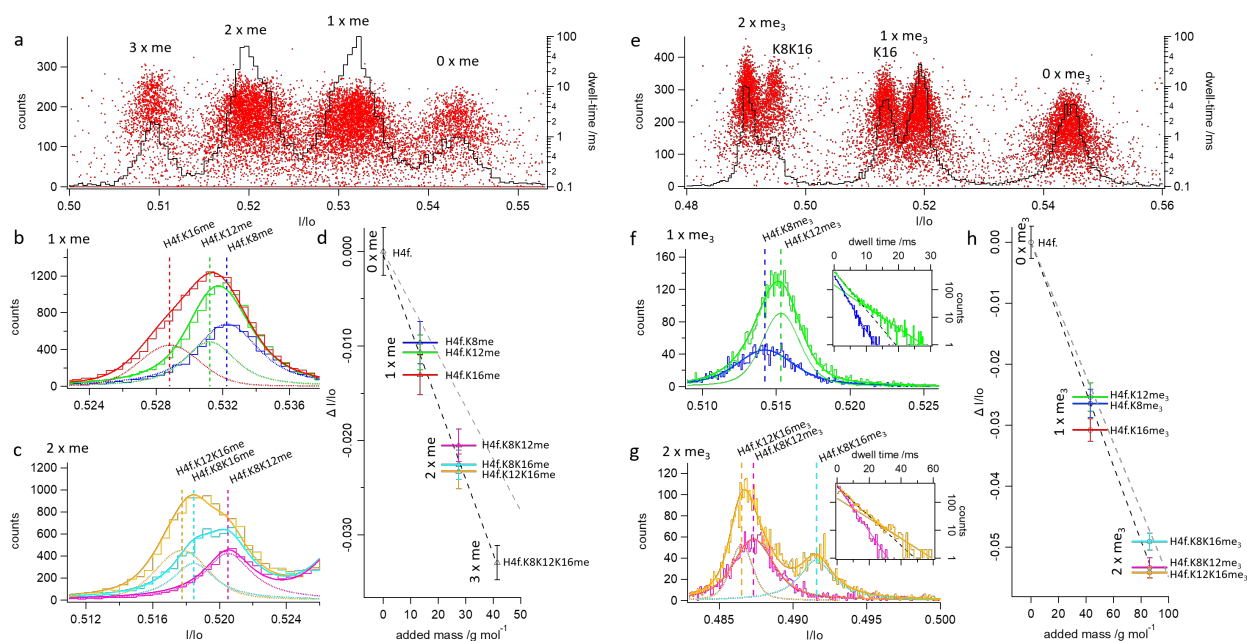

235

236 **Fig. 3| Discrimination of positional isomers from mono- and trimethylation with the R220S mutant.** **a**, Histogram of I/Io-values  
 237 (black) and scatterplot of dwell-time vs. I/Io (red) in the presence of all singly, doubly and triply monomethylated species, as well  
 238 as of unmodified H4f. Unlike for acetylation, the positional isomers (singly monomethylated H4f.K8me, H4f.K12me and H4f.K16me,  
 239 as well as doubly monomethylated H4f.K8K12me, H4f.K8K16me and H4f.K12K16me) are not obviously separated in terms of  
 240 blockade levels, as their maxima overlap (for assignment of peaks by sequential addition see **Extended Data Fig. 13 - Extended**  
 241 **Data Fig. 15**). However, as shown in **b** and **c**, sequential addition of isomeric species leads to successive broadening of the maxima,  
 242 which can be accounted for by the contribution of populations isomeric species with different means. By fitting the I/Io-histograms  
 243 (cityscapes) with a sum (thick lines) of Voigt peaks (thin lines), the respective position of the maximum of the added peptide can  
 244 be determined. **b**, Sequential addition of singly monomethylated species H4f.K8me (blue), after addition of H4f.K12me (green) and  
 245 after addition of H4f.K16me (red); **c**: sequential addition of doubly monomethylated species H4f.K8K12me (magenta), after  
 246 addition of H4f.K8K16me (turquois) and after addition of H4f.K12K16me (gold); For a complete account of the sequential addition  
 247 experiment see **Extended Data Fig. 15**. **d**, Shift of maxima with respect to that for unmodified H4f. plotted against the mass added  
 248 by monomethylation; **e**: histogram of I/Io-values (black) and scatterplot of dwell-time vs. I/Io (red) in the presence of unmodified

249 *H4f.*, as well as all singly and doubly trimethylated species. In this case, the maxima for *H4f.K8me<sub>3</sub>* and *H4f.K12me<sub>3</sub>*, as well as  
250 those for *H4f.K8K12me<sub>3</sub>* and *H4f.K12K16me<sub>3</sub>*, respectively, overlap in one peak whereas those for *H4f.K16me<sub>3</sub>* and *H4f.K8K16me<sub>3</sub>*  
251 are strongly shifted to deeper (*H4f.K16me<sub>3</sub>*) and more shallow blocks (*H4f.K8K16me<sub>3</sub>*). For assignment of peaks by sequential  
252 addition see **Extended Data Fig. 16 - Extended Data Fig. 18**; **f**: sequential addition of singly trimethylated species *H4f.K8me<sub>3</sub>* (blue)  
253 and after addition of *H4f.K12me<sub>3</sub>* (green). Note the shift towards longer dwell-times and failure of monoexponential fit (dashed  
254 line) after addition of *H4f.K12me<sub>3</sub>*; **g**, Sequential addition of singly trimethylated species *H4f.K8K12me<sub>3</sub>* (turquoise), after addition  
255 of *H4f.K8K16me<sub>3</sub>* (magenta) and *H4f.K12K16me<sub>3</sub>* (gold). Insets in **f** and **g**: dwell-time histograms for the two overlapping species.  
256 Note the shift to longer dwell-times and departure from monoexponential distribution (dashed lines) upon addition of *H4f.K12me<sub>3</sub>*  
257 or *H4f.K12K16me<sub>3</sub>*. **h**, Shift of maxima with respect to that for unmodified *H4f.* plotted against the mass added by trimethylation;  
258 All histograms in **b**, **c** and **f**, **g** were generated from recordings lasting 300 s, making them directly comparable. Grey dashed lines  
259 in **e** and **h** represent the relationship between the shift in *I/I<sub>0</sub>* and added mass for acetylation (see **Fig. 1e**).

260

261 In summary, we have shown that an engineered aerolysin nanopore can be used to quantitatively analyze  
262 both acetylation and methylation in a position-sensitive fashion by distinguishing between peptofoms of  
263 equal mass on the basis of depth-of-block and, in some cases, duration of resistive pulses. The mechanism  
264 of discrimination by resistive current can be explained by the action of a strongly inhomogeneous electric  
265 field that is shaped by the pore structure, as well as by the conformation of the confined peptide itself  
266 (**Fig. 2**). The dependence on the peptide's conformation also explains for the fact that the sequence of  
267 mean *I/I<sub>0</sub>*-values for PTM of the different lysines is different for each of the three PTMs analyzed, see  
268 **Extended Data Fig. 19**. The higher sensitivity of the mutant pore relative to the wild-type likely originates  
269 from a powerful molecular trap that the aerolysin pore provides<sup>23</sup>, and which becomes more efficient upon  
270 removal of the bulky and positively charged R220 (**Extended Data Fig. 20**, **Extended Data Fig. 21**).  
271 Additional mutations of the pore can be envisaged which, in combination with R220S, will lead to further  
272 kinetic optimization also for the use with tryptic peptides containing more than ten amino acids. To further  
273 increase differentiation among the positional isoforms, future work will focus on reducing instrumental  
274 noise<sup>45</sup> and on protein engineering to reducing the conformational degree of freedom of peptides in the  
275 pore. Thus, in a combination of parallel high-resolution electrophysiology<sup>15,18</sup> with standardized and  
276 automated enzymatic generation of peptide fragments<sup>46</sup>, whole molecule sensing with the aerolysin  
277 nanopore has the potential of being implemented in a practical technology to rapidly detect PTMs with  
278 positional resolution without requiring strand sequencing of proteins.

279

280 **Methods (online only)**

281 **Mutagenesis, Expression and Purification**

282 AeL-R220S single point mutagenesis was carried out following a four primer PCR protocol, followed by  
283 standard overlap-PCR. Gene flanking and mutagenesis primers were designed with the sequences depicted  
284 below and purchased from Eurofins Genomics GmbH (Ebersberg, Germany).

| primer   | forward                                 | reverse                                 |
|----------|-----------------------------------------|-----------------------------------------|
| flanking | GAA GAC ATG GAT GTG ACC                 | GCT AGT TAT TGC TCA GCG G               |
| mutation | GTC ACC CTG TCC TAC GAC ACA GCC ACC AAC | TGT GTC GTA GGA CAG GGT GAC GTC ATA GCC |

285

286 The mutated insert, as well as the pET22b(+) vector were restricted by BamHI and XhoI (Thermo Fisher  
287 Scientific, Waltham, MA, USA) and ligated with T4 DNA Ligase (Fermentas - Thermo Fisher Scientific,  
288 Waltham, MA, USA). Mini-scale plasmid preparation was performed after transformation of XL1-Blue  
289 competent cells via heat-shock prior to DNA sequencing (Eurofins Genomics GmbH, Ebersberg, Germany).  
290 Subsequent max-scale plasmid preparation was performed after transformation of XL1-Blue competent  
291 cells with the pET22b(+):pAeL-R220S-His<sub>6</sub> vector via heat-shock. Successful transformation of the  
292 cells with vector material containing the insert was verified by enzymatic control restriction using NdeI,  
293 XhoI and BamHI (Thermo Fisher Scientific, Waltham, MA, USA) prior to verification of the final plasmid's  
294 nucleotide sequence (Eurofins Genomics GmbH, Ebersberg, Germany).

295 Biosynthesis of wt-pAeL and pAeL-R220S was carried out in BL21(DE3)pLysS competent cells after  
296 transformation with the corresponding pET22b(+):pAeL-His<sub>6</sub> construct and cultivation at 37 °C. Gene  
297 expression was induced at OD<sub>600</sub>=0.6 by addition of 500 μM IPTG and verified by SDS-PAGE analysis. Cells  
298 were further incubated at 18 °C and harvested by centrifugation (1 h, 4400 rpm, 4 °C) when no further  
299 change of the OD<sub>600</sub> was observed. Cells were washed with cold PBS and pelleted by centrifugation  
300 (45 min, 4400 rpm, 4 °C). Cells were disrupted by ultrasonication and debris removed by  
301 ultracentrifugation (100'000 xg, 2 h, 4 °C). Protein purification was carried out by Ni-affinity-  
302 chromatography (AFI), followed by size-exclusion-chromatography (SE) using an ÄKTA HPLC purifier  
303 system (GE Healthcare/Amersham Bioscience, Chalfont St Giles, Great Britain), equipped with a 5 mL  
304 HisTrap™HP or a Superdex 200-Increase 10/300 GL column. Protein containing AFI elutions were pooled  
305 and concentrated to a final volume of 250 μL, prior to SE using Amicon®Ultra 15 mL centrifuge filters with  
306 a molecular weight cutoff of 10 kDa (Merck KGaA, Darmstadt, Germany). Purity of the SE elutions was  
307 verified by SDS-PAGE and the protein concentration determined in a Bradford assay (Coomassie brilliant

308 blue G-250, BioRad, Hercules, CA, USA). Final protein samples were adjusted to 1 mg/mL, nitrogen shock-  
309 frozen and stored at -80 °C. Activation of pAeL was carried out before an experiment by application of  
310 trypsin (Promega, Madison, WI, USA) at room-temperature within 15 min.

311

## 312 **Electrophysiology and data analysis**

313 Nanopore recordings were performed using a modified version of the Orbit16 device (Nanon  
314 Technologies, Munich, Germany using MECA 16 microelectrode cavity arrays (Ionera Technologies,  
315 Freiburg, Germany) as previously detailed<sup>8,18,23</sup>. Briefly, one of 16 coplanar gold lines leading to MECA 16-  
316 cavities (50 µm diam.) was directly contacted with a 1 cm unshielded silver wire to the head-stage of an  
317 Axopatch 200B (Molecular Devices, Sunnyvale, CA, USA) patch clamp amplifier operated in capacitive  
318 feedback mode at 50 mV/pA gain with the internal low-pass-filter set to 100 kHz cut-off (-3dB). The output  
319 signal was passed through an external low-pass Bessel filter (npi electronic, Tamm, Germany, 8 pole,  
320 custom version of LHBF-48X-8HL) set to 50 kHz cut-off and digitized at 1 MHz sampling rate using a PCI-  
321 6251 16 bit ADC interface (National Instruments, Austin, TX, USA) controlled by GePulse software (Michael  
322 Pusch, University of Genoa, Italy). Event-averaged current level detection was performed using  
323 thresholding on the differentially rectified signal as shown before<sup>20,23</sup> and explained in detail in Ref<sup>8</sup>.  
324 Further analysis and graphing were performed using IgorPro8 (Wavemetrics, Portland, OR, USA).

325

## 326 **Molecular dynamics simulations**

327 **General MD methods:** all MD simulations were carried out using NAMD2<sup>47</sup>, a 2 fs integration timestep,  
328 periodic boundary conditions, the CHARMM36<sup>48</sup> force field and CUFIX corrections to non-bonded  
329 interactions<sup>49</sup>. The covalent bonds containing hydrogen atoms in water were restrained using the SETTLE  
330 algorithm<sup>50</sup>, and in protein using the RATTLE algorithm<sup>51</sup> Long-range electrostatic interactions were  
331 evaluated using the particle mesh Ewald method<sup>52</sup> on a 1 Å grid. Constant pressure was maintained using  
332 a Nosé-Hoover Langevin piston<sup>53</sup>. Constant temperature was maintained by coupling the non-hydrogen  
333 atoms of the lipid to a Langevin thermostat (Brünger, A. T. X-PLOR: version 3.1: a system for x-ray  
334 crystallography and NMR (Yale University Press, 1992)) with a 5 ps<sup>-1</sup> damping constant. The van der Waals  
335 forces were calculated with a switching distance of 10 Å and a cutoff of 12 Å. Local interactions were  
336 evaluated every time step and full electrostatics every second time step.

337 **All-atom model of aerolysin:** the all-atom model of the aerolysin-R220S nanopore was built starting from  
338 a pre-equilibrated (20 ns), solvated model of wt-AeL embedded in a 1,2-diphytanoyl-sn-glycero-3-  
339 phosphocholine (DPhPC) –lipid bilayer<sup>23</sup> The R220S mutation was introduced using the psfgen package of  
340 VMD<sup>54</sup> The number of K<sup>+</sup> and Cl<sup>-</sup> ions was adjusted to produce an electrically neutral system containing  
341 2 M KCl solution. Upon assembly, the system underwent 1'000 steps of energy minimization and then  
342 equilibrated in the constant number of atoms (430'567), pressure (1 bar) and temperature (293 K)  
343 ensemble for 5 ns while restraining the C- $\alpha$  atoms of the protein to their initial coordinates. During the  
344 equilibration, the area of the lipid bilayer was kept constant while the system changed its size along the  
345 bilayer normal. All subsequent simulations were carried out in a constant number of atoms, volume, and  
346 temperature ensemble, where the volume (18.93 nm  $\times$  18.93 nm  $\times$  11.56 nm) was set to the average value  
347 observed within the 5 ns equilibration. The transmembrane bias  $V=-60$  mV was induced by applying a  
348 constant electric field,  $E=-V/Lz$ , normal to the lipid bilayer, where  $Lz$  was the dimension of the system along  
349 normal to the bilayer<sup>55</sup> Each C- $\alpha$  atom of aerolysin was harmonically restrained (with a spring constant of  
350 69.5 pN/nm) to maintain the same coordinate as in the last frame of the equilibration trajectory.

351 **Simulations of current blockades:** an all-atom model of the H4f. peptide (H-KGLGKGGAKR-OH) was  
352 obtained by mutating the side chains of a pre-equilibrated 10-residue peptide taken from a previous  
353 study<sup>56</sup>. The N-terminal lysine was acetylated to obtain a microscopic model of the H4f.K8Ac peptide. The  
354 peptide was then aligned with the nanopore axis and placed near the *cis*-entrance of the pore such that  
355 the C-terminal of the peptide faced the *trans*-side of the pore (**Fig. 2a**). The peptide was then pulled along  
356 the pore axis using the SMD method<sup>40,41</sup>, while restraining the C- $\alpha$  atoms of aerolysin to their equilibrated  
357 coordinates. During the 100 ns SMD run, the center of mass (CoM) of the peptide was coupled to a  
358 template particle by means of a harmonic potential (with a spring constant of 4'865 pN/nm) while the  
359 templated particle was pulled along the nanopore axis with a constant velocity of 1 Å/ns. The residual  
360 current was then calculated using SEM<sup>42</sup> for a set of microscopic configurations taken from the SMD  
361 simulation every 0.2 ns, yielding 500 relative residual current values. The currents were sorted in  
362 ascending order according to the CoM  $z$  coordinate and then averaged using a 5 Å running average  
363 window. These averaged currents are plotted in **Fig. 2b**. Using our previously described method<sup>23</sup>, each  
364 conformation was computationally mutated to obtain microscopic representations of H4f. and all single  
365 (H4f.K8Ac, H4f.K12Ac, H4f.K16Ac), double (H4f.K8K12Ac, H4f.K8K16Ac, H4f.K12K16Ac) and triple  
366 (H4f.K8K12K16Ac) acetylation peptides. The residual currents for each mutated peptide conformations,  
367 **Fig. 2b**, were calculated and averaged using the same protocol.

368

369 **Acknowledgements**

370 TE was partly funded by a PhD fellowship in the framework of the International Graduate College 1642  
371 “Soft Matter Science: Concepts for the Design of Functional Materials” of the Deutsche  
372 Forschungsgemeinschaft (DFG). Work in JCB’s laboratory was funded by the German Ministry for Research  
373 and Education through Project Management PTJ (TseNareo), by the BW Foundation through Project  
374 Management VDI (MSDS-BioMem) and by the Ministry of Commerce of the State of Baden-Württemberg  
375 in the Framework of the Forum Gesundheitsstandort Baden-Württemberg (TechPatNano). K.S. and A.A.  
376 acknowledge support from the US National Science Foundation (PHY- 1430124). The supercomputer time  
377 was provided through the XSEDE Allocation Grant MCA05S028 and the Leadership Resource Allocation  
378 MCB20012 on Frontera of the Texas Advanced Computing Center. We thank Dr. Gerhard Mittler, Max  
379 Planck Institute of Immunobiology and Epigenetics, Freiburg, for helpful suggestions.

380

381 **Author contributions** T.E. and J.C.B. conceived and designed experimental work, T.E. performed  
382 electrophysiological experiments, molecular biology and protein purification, T.E. and J.C.B. analysed  
383 experimental data, K.S. and A.A. designed MD simulations, K.S. performed MD simulations, K.S. and A.A.  
384 analysed MD simulations, T.E. J.C.B. K.S. and A.A prepared figures, T.E., J.C.B. and A.A. wrote the  
385 manuscript.

386

387 **Competing interests** J.C.B. is co-founder and shareholder of Nanion Technologies GmbH, Munich,  
388 Germany and Ionera Technologies GmbH, Freiburg, Germany

389

390 **Correspondence and requests for materials** should be addressed to A.A. or J.C.B.

391

392 References:

- 393 1. Leutert, M., Entwisle, S. W. & Villén, J. Decoding post translational modification crosstalk with  
394 proteomics. *Mol Cell Proteomics* 20, 100129 (2021).
- 395 2. Alfaro, J. A. *et al.* The emerging landscape of single-molecule protein sequencing technologies. *Nat*  
396 *Methods* 18, 604–617 (2021).
- 397 3. Yan, S. *et al.* Single Molecule Ratcheting Motion of Peptides in a Mycobacterium smegmatis Porin A  
398 (MspA) Nanopore. *Nano Lett* 21, 6703–6710 (2021).
- 399 4. Brinkerhoff, H., Kang, A. S. W., Liu, J., Aksimentiev, A. & Dekker, C. Multiple rereads of single proteins  
400 at single–amino acid resolution using nanopores. *Science* eabl4381 (2021) doi:10.1126/science.abl4381.
- 401 5. Chen, Q. Y., Costa, M., Sun, H. & USA, D. of E. M., NYU School of Medicine, Tuxedo, NY 10987,.  
402 Structure and function of histone acetyltransferase MOF. *Aims Biophysics* 2, 555–569 (2015).
- 403 6. Bowman, G. D. & Poirier, M. G. Post-Translational Modifications of Histones That Influence  
404 Nucleosome Dynamics. *Chem Rev* 115, 2274–2295 (2015).
- 405 7. Kasianowicz, J. J. *et al.* Analytical applications for pore-forming proteins. *Biochimica Et Biophysica Acta*  
406 *Bba - Biomembr* 1858, 593–606 (2016).
- 407 8. Piguet, F. *et al.* Pore-forming toxins as tools for polymer analytics: From sizing to sequencing. *Methods*  
408 *Enzymol* 649, 587–634 (2021).
- 409 9. Derrington, I. M. *et al.* Nanopore DNA sequencing with MspA. *Proc National Acad Sci* 107, 16060–  
410 16065 (2010).
- 411 10. Laszlo, A. H. *et al.* Decoding long nanopore sequencing reads of natural DNA. *Nat Biotechnol* 32, 829–  
412 833 (2014).
- 413 11. Lin, B., Hui, J. & Mao, H. Nanopore Technology and Its Applications in Gene Sequencing. *Biosensors*  
414 11, 214 (2021).
- 415 12. Robertson, J. W. F. *et al.* Single-molecule mass spectrometry in solution using a solitary nanopore.  
416 *Proc National Acad Sci* 104, 8207–8211 (2007).
- 417 13. Rodrigues, C. G., Machado, D. C., Chevtchenko, S. F. & Krasilnikov, O. V. Mechanism of KCl  
418 Enhancement in Detection of Nonionic Polymers by Nanopore Sensors. *Biophys J* 95, 5186–5192 (2008).
- 419 14. Reiner, J. E., Kasianowicz, J. J., Nablo, B. J. & Robertson, J. W. F. Theory for polymer analysis using  
420 nanopore-based single-molecule mass spectrometry. *Proc National Acad Sci* 107, 12080–12085 (2010).
- 421 15. Baaken, G., Ankri, N., Schuler, A.-K., Rühle, J. & Behrends, J. C. Nanopore-Based Single-Molecule Mass  
422 Spectrometry on a Lipid Membrane Microarray. *Acs Nano* 5, 8080–8088 (2011).

- 423 16. Balijepalli, A., Robertson, J. W. F., Reiner, J. E., Kasianowicz, J. J. & Pastor, R. W. Theory of Polymer–  
424 Nanopore Interactions Refined Using Molecular Dynamics Simulations. *J Am Chem Soc* 135, 7064–7072  
425 (2013).
- 426 17. Zheng, T., Baaken, G., Vellinger, M., Behrends, J. C. & Rühle, J. Generation of chip based  
427 microelectrochemical cell arrays for long-term and high-resolution recording of ionic currents through  
428 ion channel proteins. *Sensors Actuators B Chem* 205, 268–275 (2014).
- 429 18. Martinez, J. M. del R., Zaitseva, E., Petersen, S., Baaken, G. & Behrends, J. C. Automated Formation of  
430 Lipid Membrane Microarrays for Ionic Single-Molecule Sensing with Protein Nanopores. *Small* 11, 119–  
431 125 (2015).
- 432 19. Talarimoghari, M., Baaken, G., Hanselmann, R. & Behrends, J. C. Size-dependent interaction of a 3-  
433 arm star poly(ethylene glycol) with two biological nanopores. *The European Physical Journal E* 41, 77  
434 (2018).
- 435 20. Baaken, G. *et al.* High-Resolution Size-Discrimination of Single Nonionic Synthetic Polymers with a  
436 Highly Charged Biological Nanopore. *Acs Nano* 9, 6443–6449 (2015).
- 437 21. Cao, C. *et al.* Discrimination of oligonucleotides of different lengths with a wild-type aerolysin  
438 nanopore. *Nature Nanotechnology* 11, 713–718 (2016).
- 439 22. Piguet, F. *et al.* Identification of single amino acid differences in uniformly charged homopolymeric  
440 peptides with aerolysin nanopore. *Nat Commun* 9, 966 (2018).
- 441 23. Ouldali, H. *et al.* Electrical recognition of the twenty proteinogenic amino acids using an aerolysin  
442 nanopore. *Nature Biotechnology* 38, 176–181 (2020).
- 443 24. Howorka, S. & Siwy, Z. S. Reading amino acids in a nanopore. *Nature Biotechnology* 1–2 (2020)  
444 doi:10.1038/s41587-019-0401-y.
- 445 25. Asandei, A. *et al.* Nanopore-Based Protein Sequencing Using Biopores: Current Achievements and  
446 Open Challenges. *Small Methods* 4, 1900595 (2020).
- 447 26. Harrington, L., Alexander, L. T., Knapp, S. & Bayley, H. Single-Molecule Protein Phosphorylation and  
448 Dephosphorylation by Nanopore Enzymology. *Acs Nano* 13, 633–641 (2019).
- 449 27. Li, S. *et al.* T232K/K238Q Aerolysin Nanopore for Mapping Adjacent Phosphorylation Sites of a Single  
450 Tau Peptide. *Small Methods* 4, 2000014 (2020).
- 451 28. Huo, M., Hu, Z., Ying, Y. & Long, Y. Enhanced identification of Tau acetylation and phosphorylation  
452 with an engineered aerolysin nanopore. *Proteomics* 2100041 (2021) doi:10.1002/pmic.202100041.
- 453 29. Zhang, L. *et al.* Detection of single peptide with only one amino acid modification via electronic  
454 fingerprinting using reengineered durable channel of Phi29 DNA packaging motor. *Biomaterials* 276,  
455 121022 (2021).



- 456 30. Rosen, C. B., Rodriguez-Larrea, D. & Bayley, H. Single-molecule site-specific detection of protein  
457 phosphorylation with a nanopore. *Nat Biotechnol* 32, 179–181 (2014).
- 458 31. Reiner, J. E. *et al.* The effects of diffusion on an exonuclease/nanopore-based DNA sequencing  
459 engine. *J Chem Phys* 137, 214903 (2012).
- 460 32. Lang, D. *et al.* Probing the acetylation code of histone H4. *Proteomics* 13, 2989–2997 (2013).
- 461 33. Shahbazian, M. D. & Grunstein, M. Functions of Site-Specific Histone Acetylation and Deacetylation.  
462 *Annu Rev Biochem* 76, 75–100 (2007).
- 463 34. Basilicata, M. F. *et al.* De novo mutations in MSL3 cause an X-linked syndrome marked by impaired  
464 histone H4 lysine 16 acetylation. *Nat Genet* 50, 1442–1451 (2018).
- 465 35. Samata, M. *et al.* Intergenerationally Maintained Histone H4 Lysine 16 Acetylation Is Instructive for  
466 Future Gene Activation. *Cell* 182, 127–144.e23 (2020).
- 467 36. Zhao, Q., Zoysa, R. S. S. de, Wang, D., Jayawardhana, D. A. & Guan, X. Real-Time Monitoring of  
468 Peptide Cleavage Using a Nanopore Probe. *J Am Chem Soc* 131, 6324–6325 (2009).
- 469 37. Cao, C. *et al.* Single-molecule sensing of peptides and nucleic acids by engineered aerolysin  
470 nanopores. *Nature Communications* 10, 4918 (2019).
- 471 38. Li, S. *et al.* T232K/K238Q Aerolysin Nanopore for Mapping Adjacent Phosphorylation Sites of a Single  
472 Tau Peptide. *Small Methods* 4, 2000014 (2020).
- 473 39. Syganow, A. & Kitzing, E. von. (In)validity of the Constant Field and Constant Currents Assumptions in  
474 Theories of Ion Transport. *Biophys J* 76, 768–781 (1999).
- 475 40. Isralewitz, B., Izrailev, S. & Schulten, K. Binding pathway of retinal to bacterio-opsin: a prediction by  
476 molecular dynamics simulations. *Biophys J* 73, 2972–2979 (1997).
- 477 41. Grubmüller, H., Heymann, B. & Tavan, P. Ligand Binding: Molecular Mechanics Calculation of the  
478 Streptavidin-Biotin Rupture Force. *Science* 271, 997–999 (1996).
- 479 42. Wilson, J., Sarthak, K., Si, W., Gao, L. & Aksimentiev, A. Rapid and Accurate Determination of  
480 Nanopore Ionic Current Using a Steric Exclusion Model. *ACS Sensors* 4, 634–644 (2019).
- 481 43. Rathert, P., Dhayalan, A., Ma, H. & Jeltsch, A. Specificity of protein lysine methyltransferases and  
482 methods for detection of lysine methylation of non-histone proteins. *Mol Biosyst* 4, 1186–1190 (2008).
- 483 44. Weirich, S., Khella, M. S. & Jeltsch, A. Structure, Activity and Function of the Suv39h1 and Suv39h2  
484 Protein Lysine Methyltransferases. *Life* 11, 703 (2021).
- 485 45. Sigworth, F. J. & Klemic, K. G. Microchip Technology in Ion-Channel Research. *IEEE T Nanobiosci* 4,  
486 121–127 (2005).

- 487 46. Klatt, J.-N. *et al.* Tryptic digestion of human serum for proteomic mass spectrometry automated by  
488 centrifugal microfluidics. *Lab Chip* 20, 2937–2946 (2020).
- 489 47. Phillips, J. C. *et al.* Scalable molecular dynamics on CPU and GPU architectures with NAMD. *J Chem*  
490 *Phys* 153, 044130 (2020).
- 491 48. MacKerell, A. D. *et al.* All-Atom Empirical Potential for Molecular Modeling and Dynamics Studies of  
492 Proteins †. *J Phys Chem B* 102, 3586–3616 (1998).
- 493 49. Yoo, J. & Aksimentiev, A. New tricks for old dogs: improving the accuracy of biomolecular force fields  
494 by pair-specific corrections to non-bonded interactions. *Phys Chem Chem Phys* 20, 8432–8449 (2018).
- 495 50. Miyamoto, S. & Kollman, P. A. Settle: An analytical version of the SHAKE and RATTLE algorithm for  
496 rigid water models. *J Comput Chem* 13, 952–962 (1992).
- 497 51. Andersen, H. C. Rattle: A “velocity” version of the shake algorithm for molecular dynamics  
498 calculations. *J Comput Phys* 52, 24–34 (1983).
- 499 52. Darden, T., York, D. & Pedersen, L. Particle mesh Ewald: An  $N \cdot \log(N)$  method for Ewald sums in  
500 large systems. *J Chem Phys* 98, 10089–10092 (1993).
- 501 53. Martyna, G. J., Tobias, D. J. & Klein, M. L. Constant pressure molecular dynamics algorithms. *J Chem*  
502 *Phys* 101, 4177–4189 (1994).
- 503 54. Humphrey, W., Dalke, A. & Schulten, K. VMD: Visual molecular dynamics. *J Mol Graphics* 14, 33–38  
504 (1996).
- 505 55. Aksimentiev, A. & Schulten, K. Imaging  $\alpha$ -Hemolysin with Molecular Dynamics: Ionic Conductance,  
506 Osmotic Permeability, and the Electrostatic Potential Map. *Biophys J* 88, 3745–3761 (2005).
- 507 56. Lucas, F. L. R. *et al.* The Manipulation of the Internal Hydrophobicity of FraC Nanopores Augments  
508 Peptide Capture and Recognition. *ACS Nano* 15, 9600–9613 (2021).

509

510

511 **Extended Data Figures:**

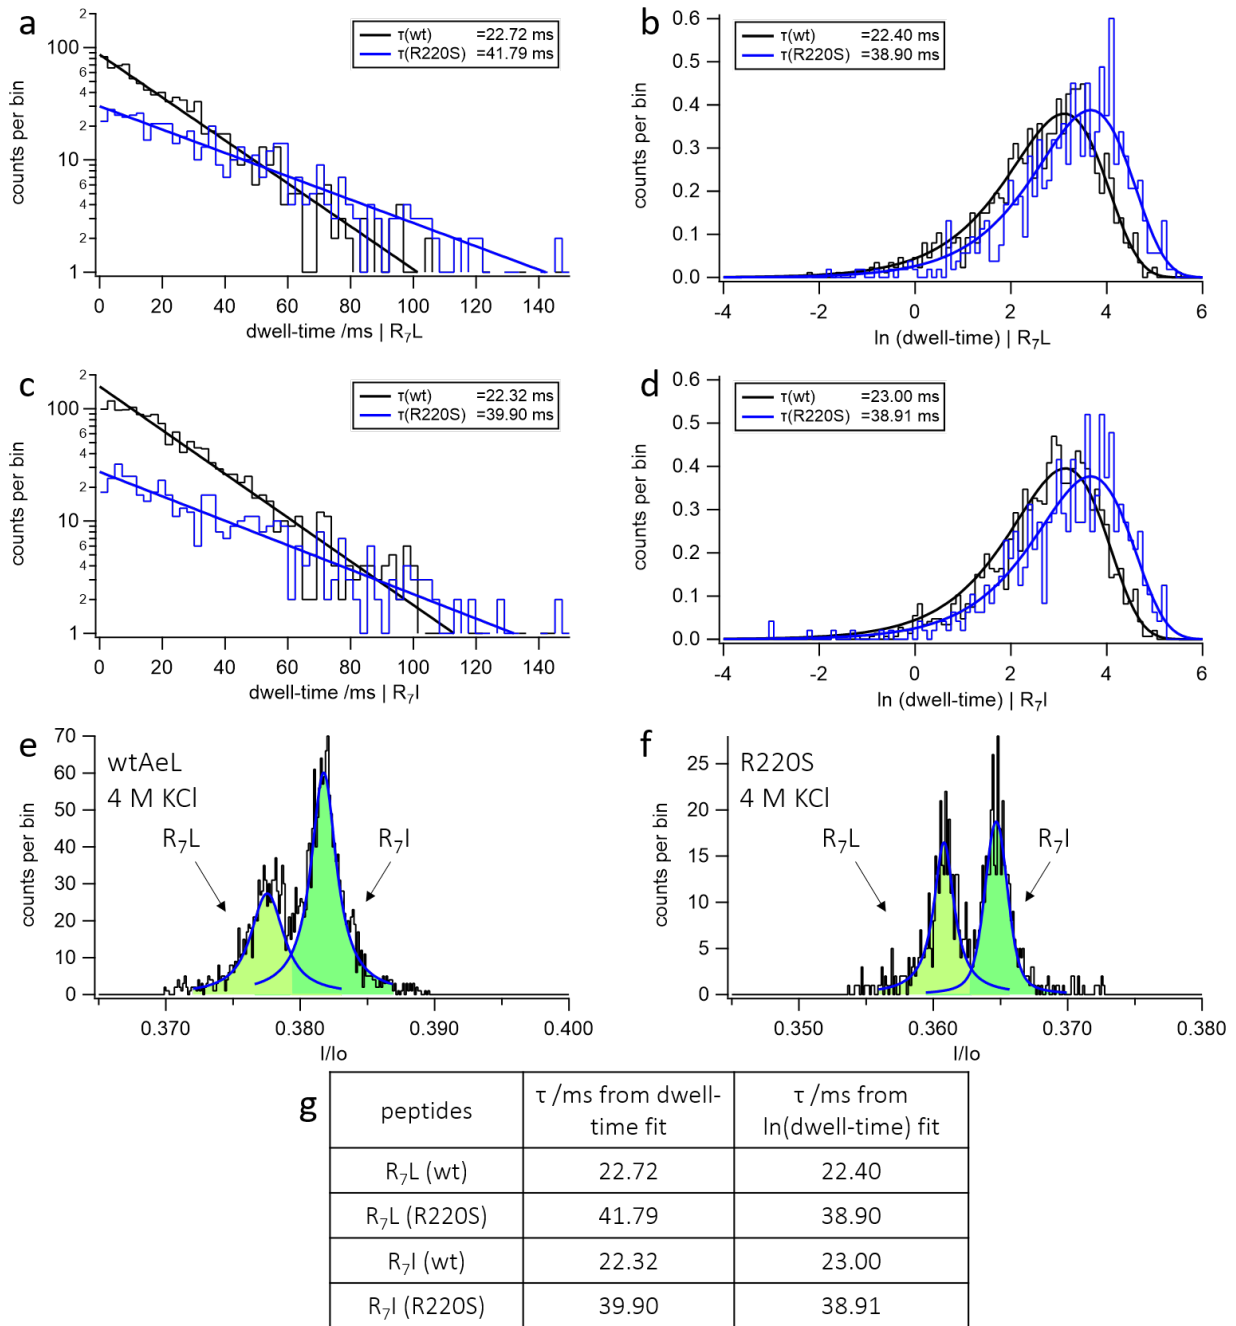

512

513 **Extended Data Fig. 1 | Dwell-time prologation due to R220 single point mutagenesis. a-d,** Prolongation of dwell-times of hepta-  
514 arginine-leucine, R<sub>7</sub>L, and hepta-arginine-isoleucine, R<sub>7</sub>I, peptides in the R220S mutant (blue) vs. wt-AeL pore (black). **e, f,** enhanced  
515 discrimination of the isomeric peptides using the R220S mutant.

516

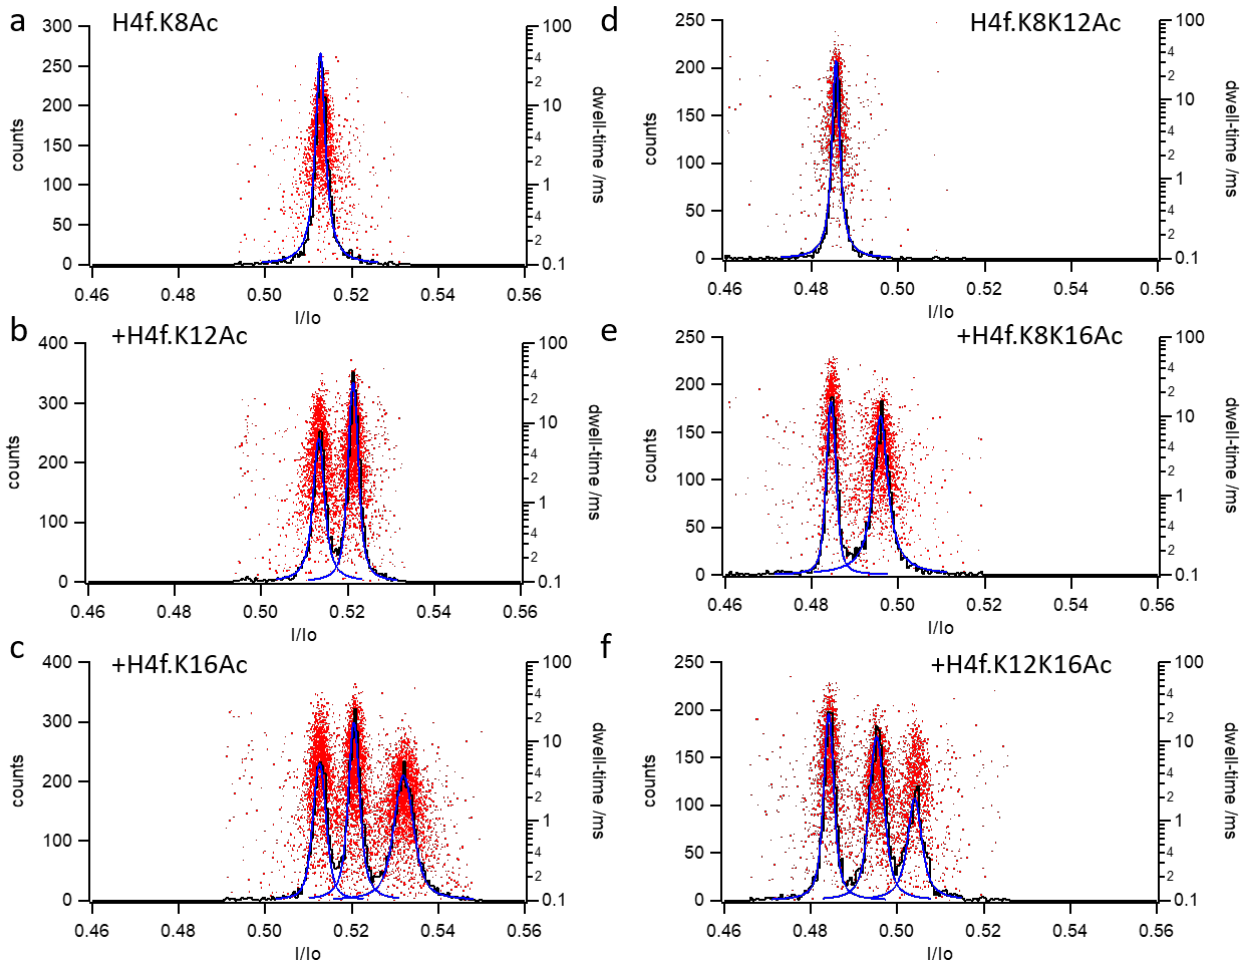

517

518 *Extended Data Fig. 2* | Assignment of maxima for acetylated species of H4f. by sequential addition of H4f. peptides with one (a-c)  
519 or two (d-f) acetylated residues using sequential addition with the R220S mutant pore.

520

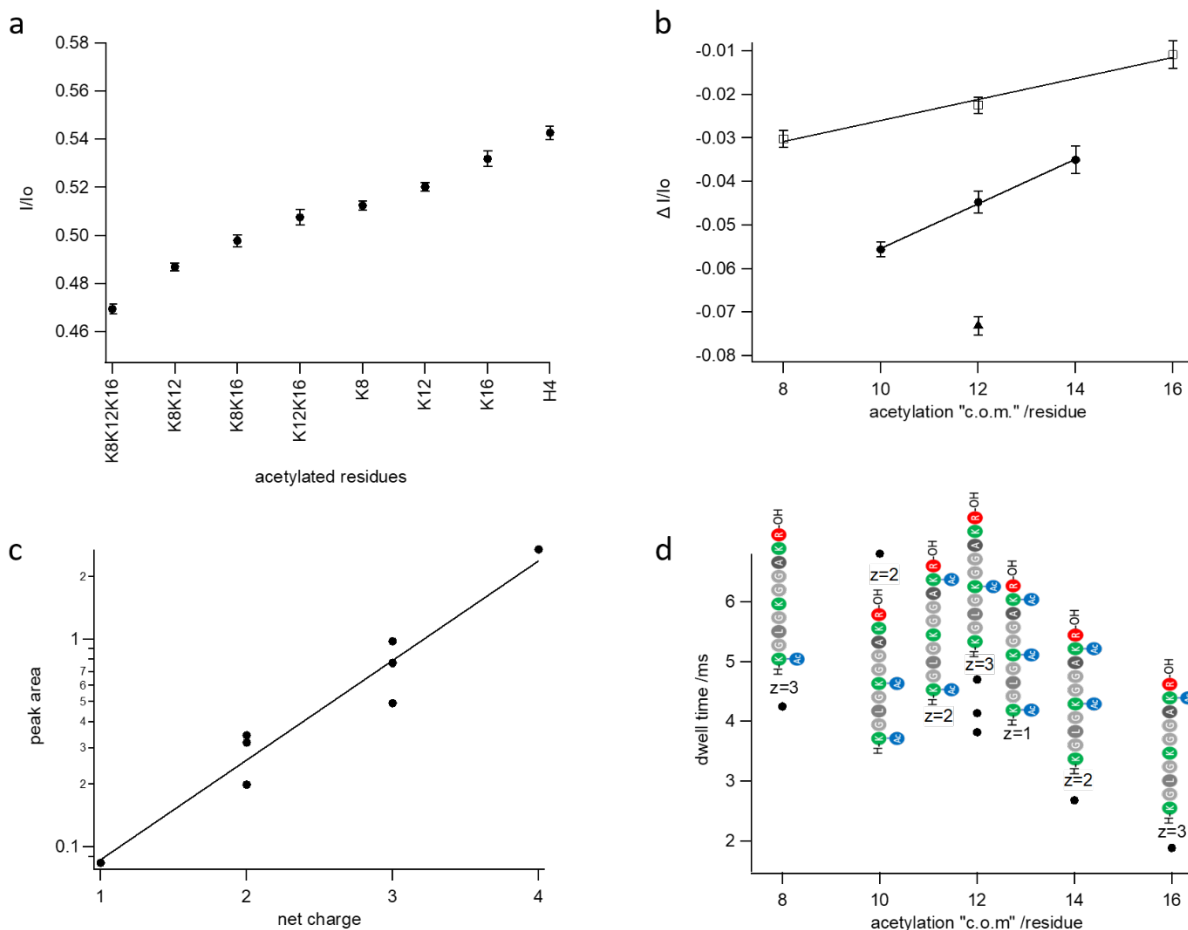

521

522 **Extended Data Fig. 3 | a**, Positions of maxima for interaction of H4f., H4f.K8Ac, H4f.K12Ac, H4f.K16Ac, H4f.K8K12Ac, H4f.K8K16Ac,  
 523 H4f.K12K16Ac and H4f.K8K12K16Ac determined with the R220S mutant. Error bars show full width at half maximum of Voigt fits  
 524 (Fig. 1d). **b**, Shift in  $I/I_0$  produced by acetylation plotted against the mean position or „center of mass, c.o.m.“ of the modification  
 525 for single (open squares), double (filled circles) and triple acetylation (filled triangles). **c**, Logarithmic dependence of peak area  
 526 as a measure of event frequency on net charge of the peptide. Note decrease of frequency with loss of net charge due to acetylation.  
 527 **d**, Characteristic dwell-times (see **Extended Data Fig. 4**) vs. acetylation „center of mass“. Note increase from single acetylation at  
 528 position 16 to double acetylation at positions 8 and 12. Charge numbers are given to show the absence of dependence of dwell-  
 529 time on peptide charge.

530

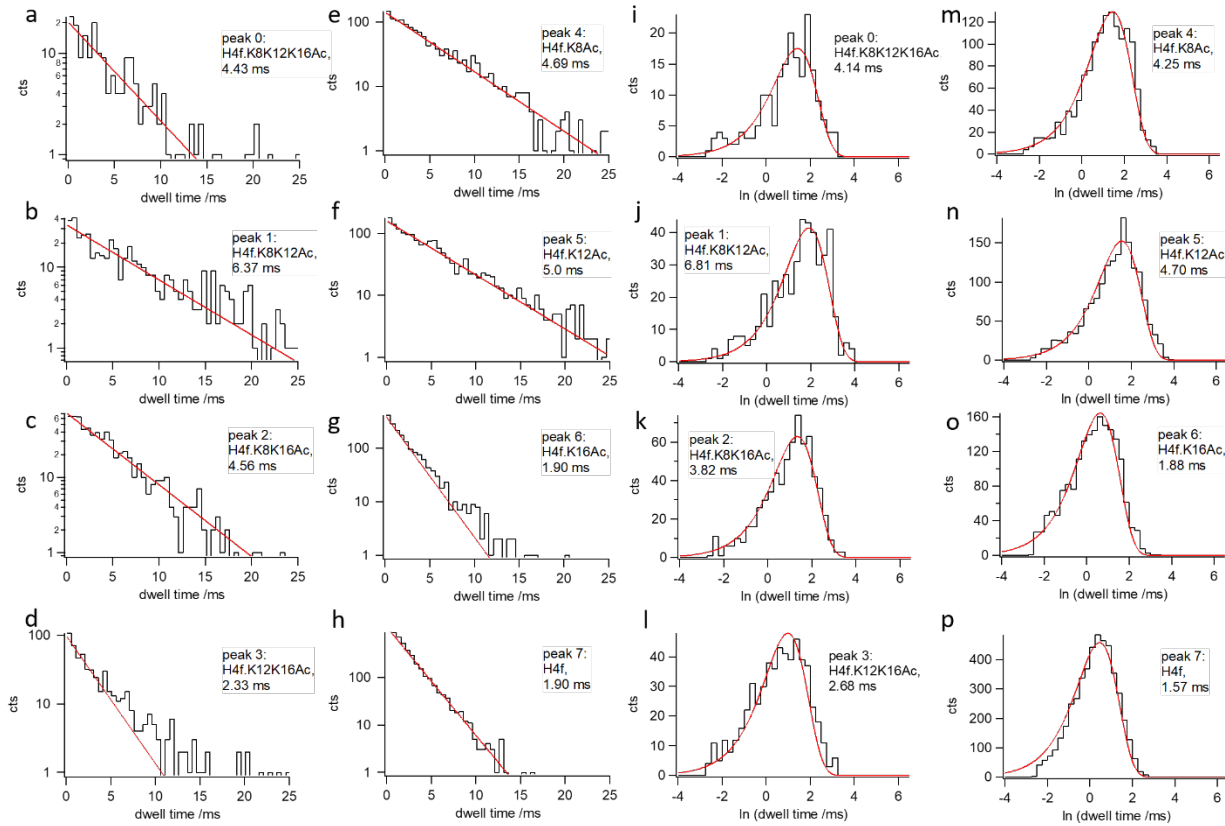

531

532 **Extended Data Fig. 4]** Dwell-time distributions for interaction of H4f-, H4f.K8Ac, H4f.K12Ac, H4f.K16Ac, H4f.K8K12Ac,  
 533 H4f.K8K16Ac, H4f.K12K16Ac and H4f.K8K12K16Ac with the R220S mutant. **a-h**, semilogarithmic plots; **i-p**, histograms of natural  
 534 logarithm of dwell-times. Red lines: monoexponential fits.

535

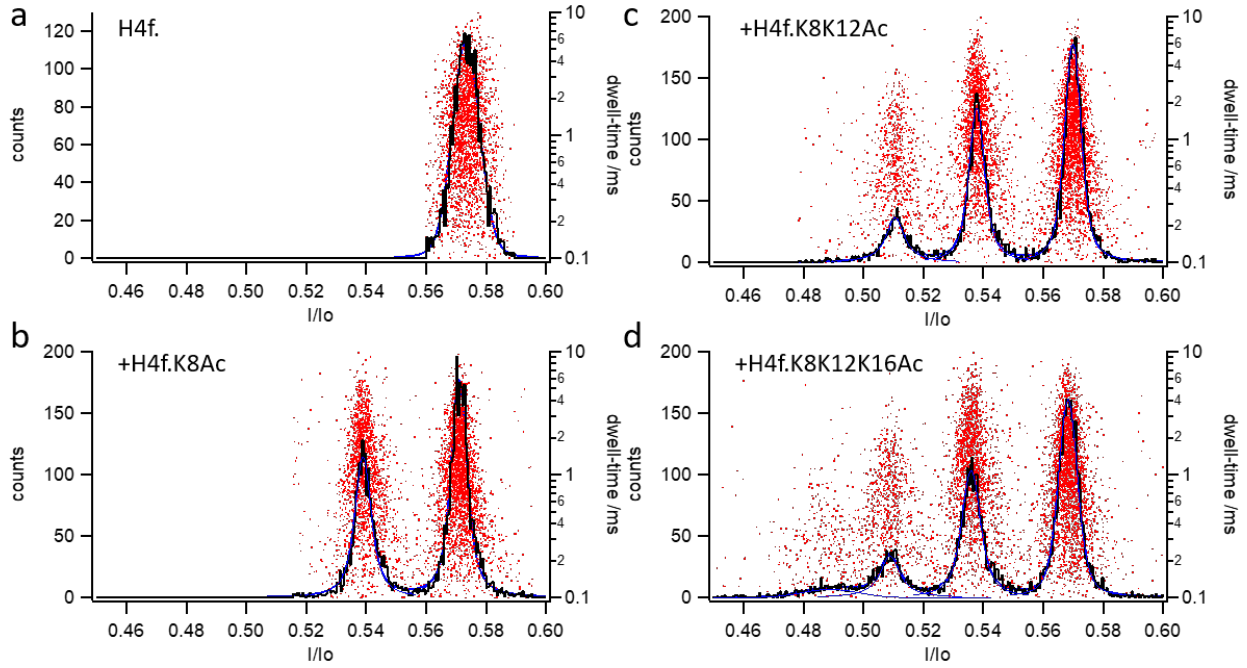

536

537 *Extended Data Fig. 5* | Assignment of maxima to species H4f, H4f.K8Ac, H4f.K8K12Ac and H4f.K8K12K16Ac using sequential  
538 peptide addition with the wt-AeL pore.

539

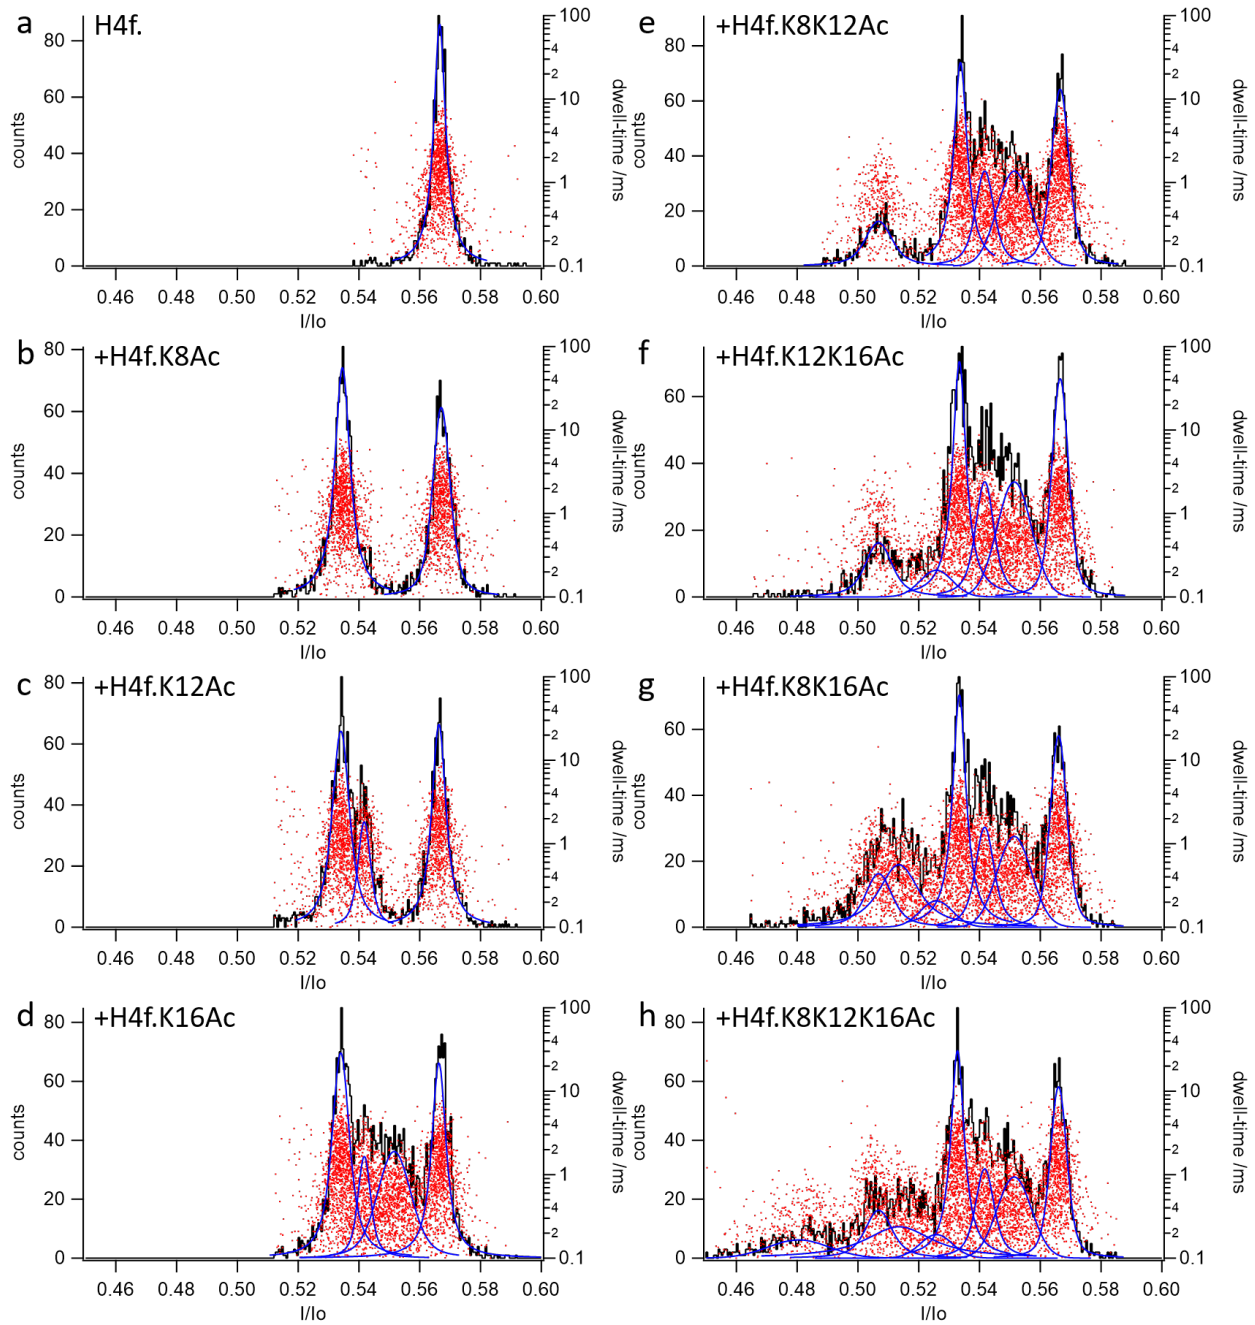

540

541 **Extended Data Fig. 6** | Assignment of maxima to species H4f., H4f.K8Ac, H4f.K12Ac, H4f.K16Ac, H4f.K8K12Ac, H4f.K8K16Ac,  
542 H4f.K12K16Ac and H4f.K8K12K16Ac using sequential peptide addition with the wt-AeL pore.

543



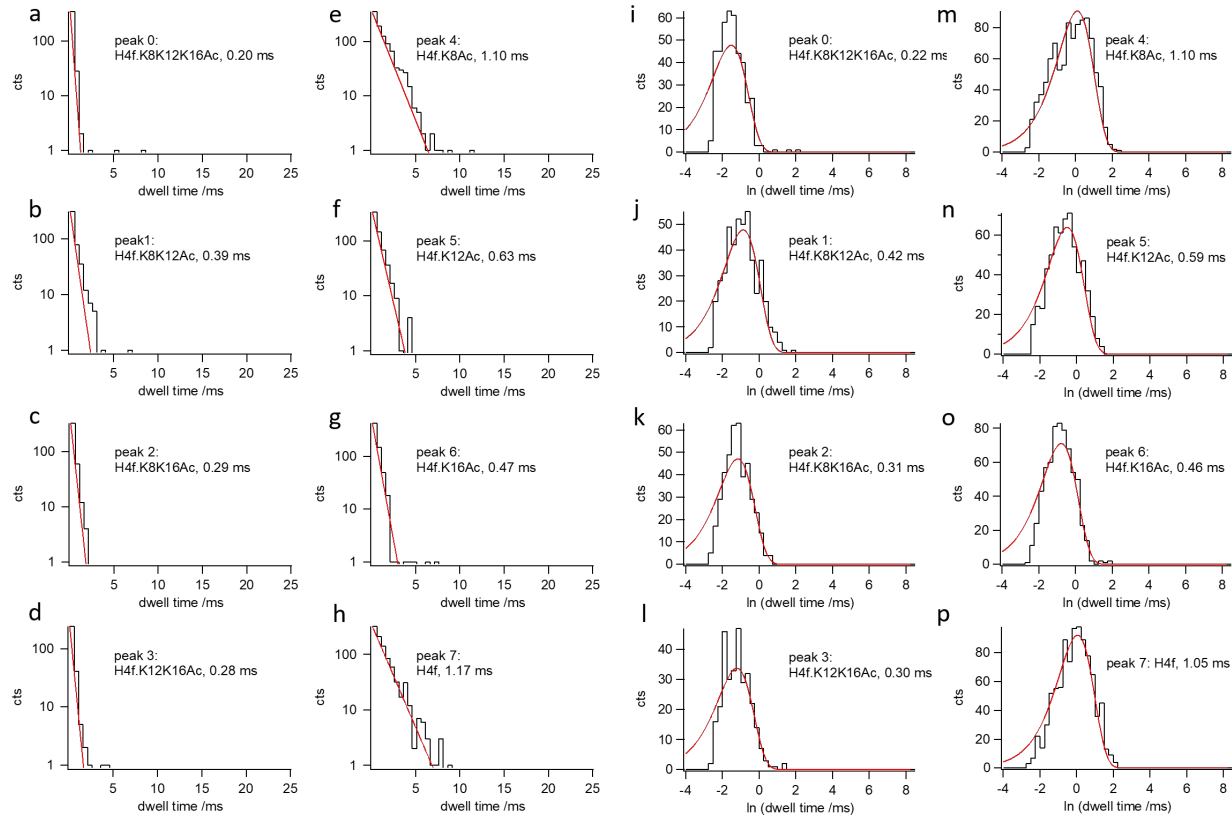

544

545 **Extended Data Fig. 7** | Dwell-time distributions for interaction of H4f., H4f.K8Ac, H4f.K12Ac, H4f.K16Ac, H4f.K8K12Ac,  
546 H4f.K8K16Ac, H4f.K12K16Ac and H4f.K8K12K16Ac with the wt-AeL pore. **a-h**, Semilogarithmic plots. **i-p**, Histograms of natural  
547 logarithm of dwell-times. Red lines: monoexponential fits.

548

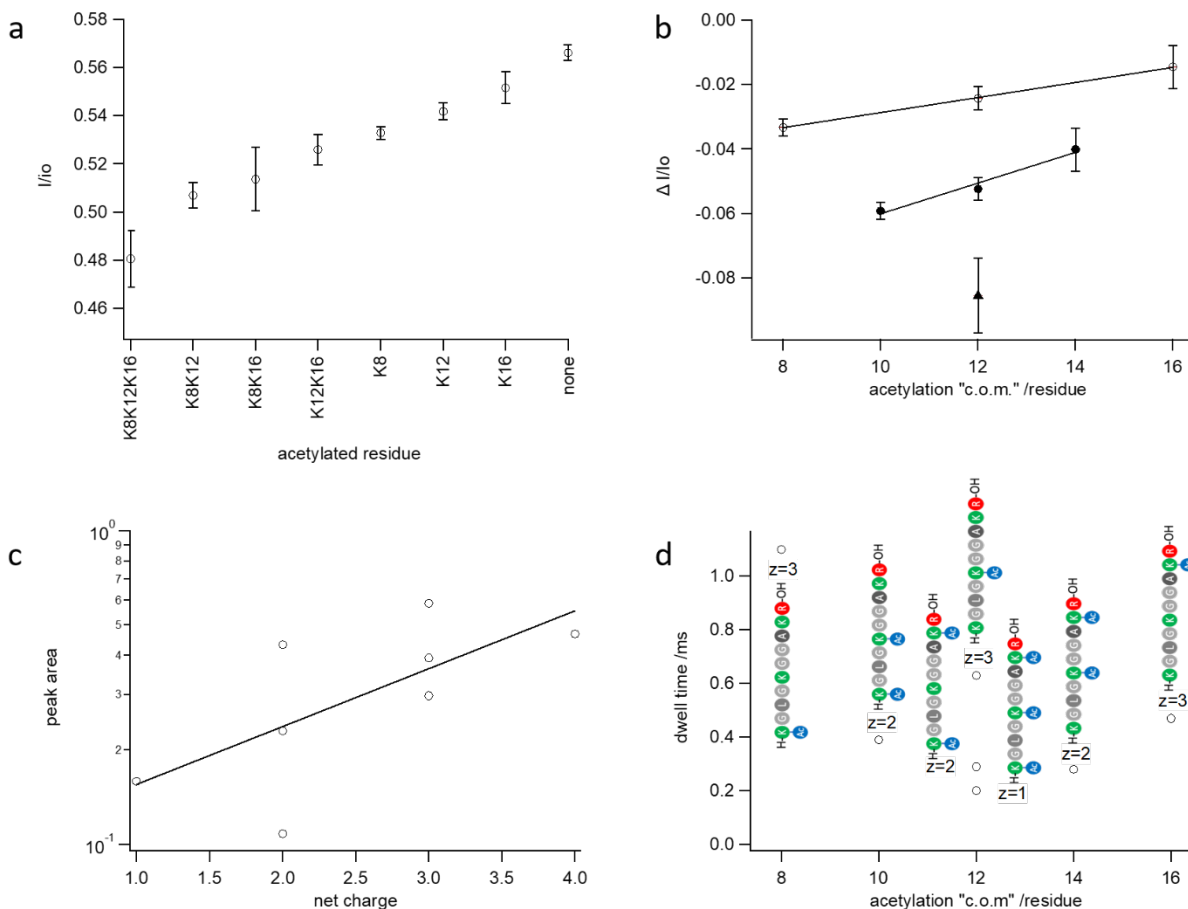

549

550 **Extended Data Fig. 8 | a**, Positions of maxima for interaction of H4f., H4f.K8Ac, H4f.K12Ac, H4f.K16Ac, H4f.K8K12Ac, H4f.K8K16Ac,  
 551 H4f.K12K16Ac and H4f.K8K12K16Ac with the wt-AeL pore. Error bars show full width at half maximum of Voigt fits (**Fig. 1**). **b**, Shift  
 552 in  $I/I_0$  produced by acetylation plotted against the mean position or „center of mass, c.o.m.“ of the modification for single (open  
 553 squares), double (filled circles), and triple acetylation (filled triangles). **c**, Logarithmic dependence of peak area as a measure of  
 554 event frequency on net charge of the peptide. Note decrease of frequency with loss of net charge due to acetylation. **d**,  
 555 Characteristic dwell-times (see **Extended Data Fig. 4**) vs. acetylation „center of mass“. Note decrease from single acetylation at  
 556 position 8, 12 or 16 to double acetylation at positions 8 and 12 or 8 and 16. Charge numbers are given to show the absence of  
 557 dependence of dwell-time on peptide charge.

558

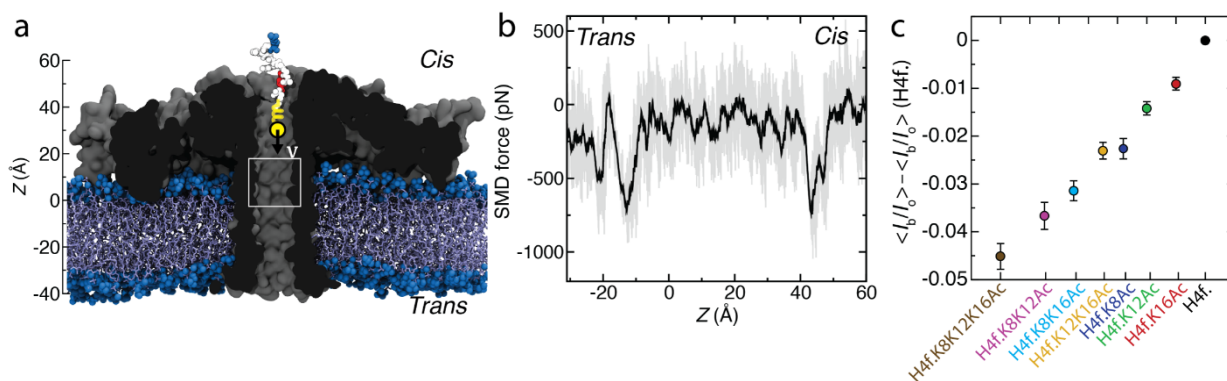

559

560 **Extended Data Fig. 9 | Steered MD simulation of H4f.K8Ac peptide through R220S aerolysin. a**, initial state of a 100 ns steered  
 561 molecular dynamics simulation (same as in **Fig. 2a**) where an H4f.K8Ac peptide (vdw spheres) is pulled by a harmonic spring with

562 *a constant velocity of 1 Å/ns through an aerolysin nanopore (cutaway molecular surface), embedded in a lipid membrane (blue)*  
563 *and submerged in 2 M KCl electrolyte (not shown). The C-terminus of the peptide is oriented towards the trans-side of the*  
564 *membrane. The white rectangle indicates the region (-2 Å < z < 18 Å) used for averaging in panel c. **b**, Force exerted by the SMD*  
565 *spring (running average: 0.5 Å) vs. the z coordinate of the H4f.K8Ac peptide; **c**, Simulated average relative currents produced by*  
566 *the acetylated peptides calculated as a difference from the baseline H4f. peptide within the region highlighted in the inset of **Fig.***  
567 *2b (-2 Å < z < 18 Å). The error bars show the standard error calculated using 80 current values*

568

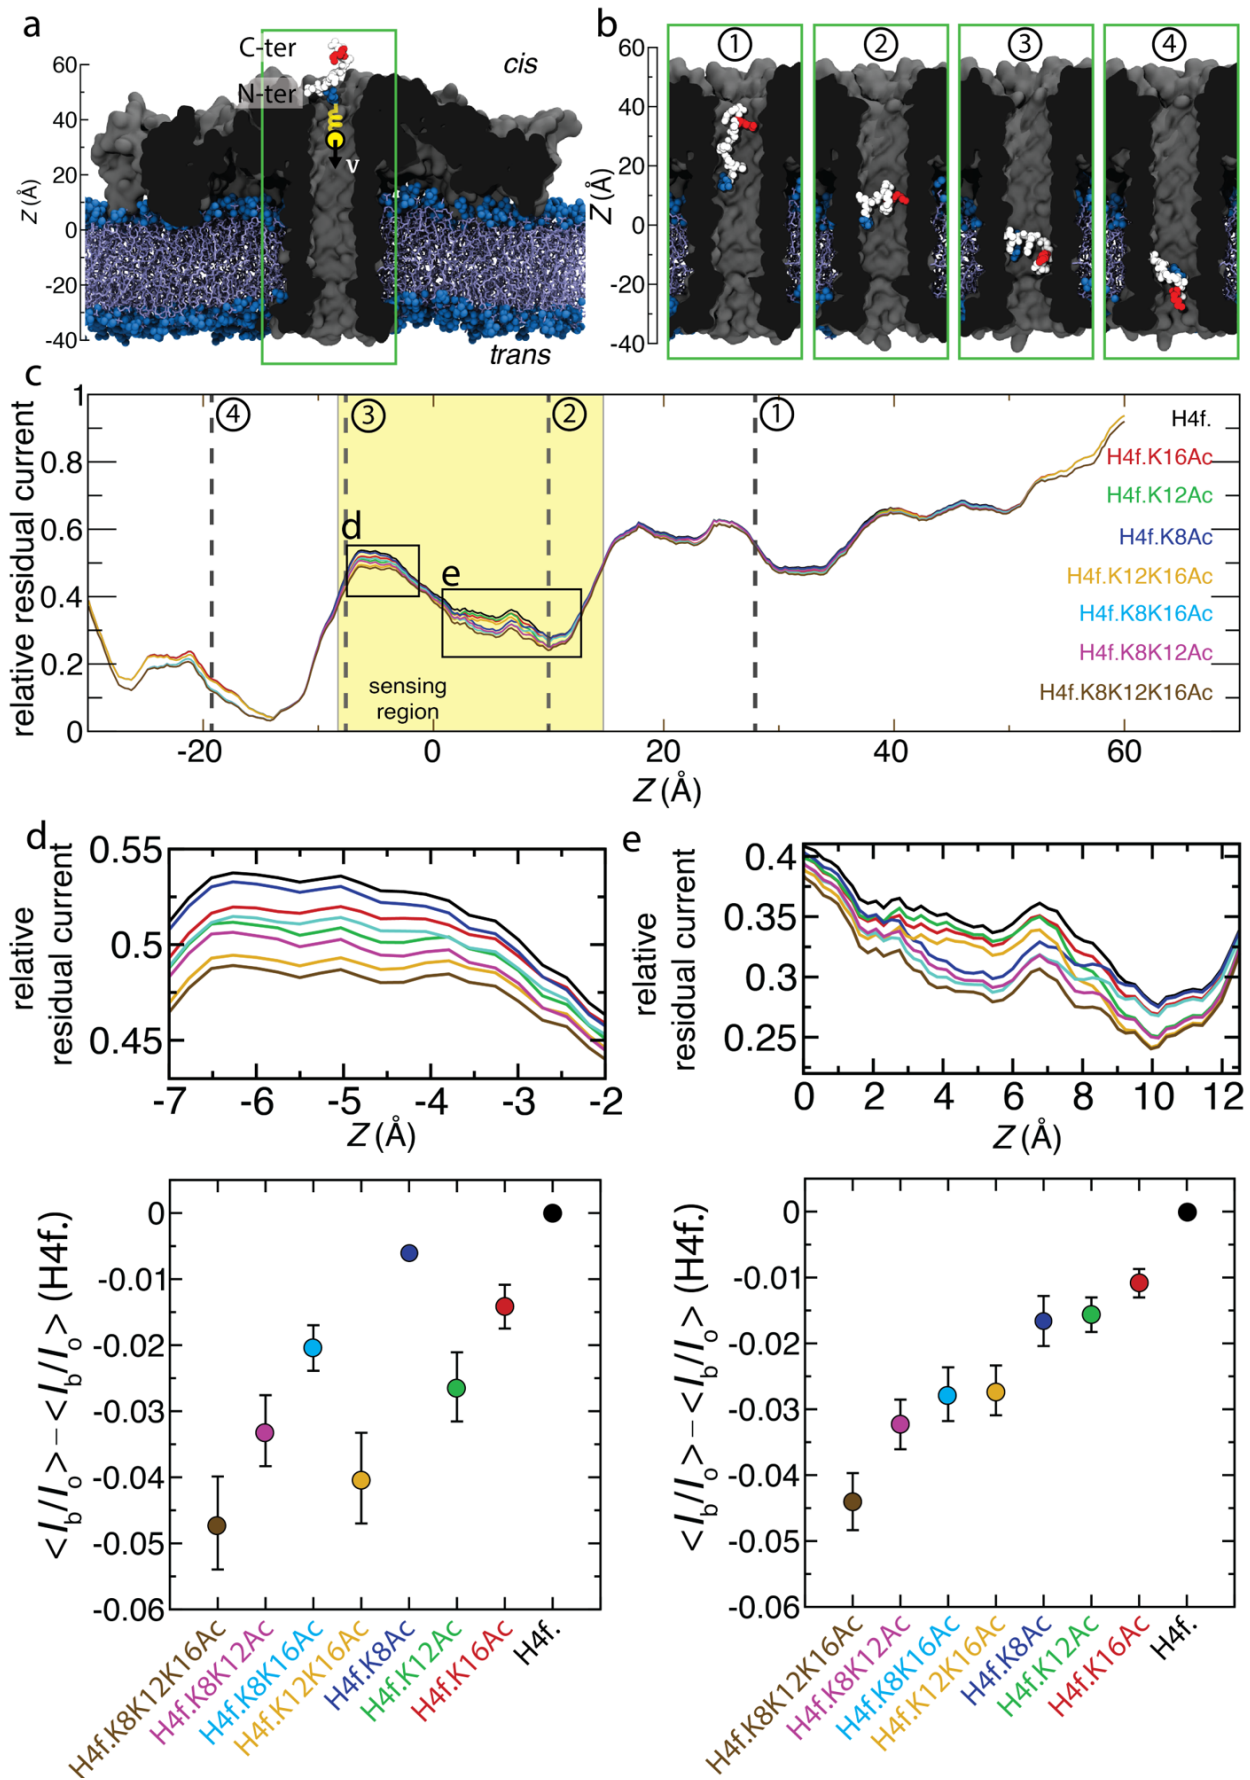

570 **Extended Data Fig. 10| Blockade current of acetylation modification depends on the global conformation of the peptide in the**  
571 **nanopore.** **a**, initial state of a 100 ns steered MD simulation where an H4f.K8Ac peptide (vdW spheres) is pulled by a harmonic  
572 spring with a constant velocity of 1 Å/ns through an aerolysin nanopore (cutaway molecular surface), embedded in a lipid  
573 membrane (blue) and submerged in 2 M KCl electrolyte (not shown). The N-terminus of the peptide is oriented towards the trans-  
574 side of the membrane. The orientation is opposite to that shown in **Fig. 2a**. The green box shows the nanopore volume shown in  
575 panel **b**. **b**, Representative conformations of the H4f.K8Ac peptide along the SMD simulation chronologically shown from left to  
576 right. As the simulation progresses, the peptide reverses its orientation leading to the C-terminal end of the peptide facing the  
577 trans-side of the pore while the peptide exits the pore. **c**, Relative residual current versus center of mass z coordinate of the  
578 acetylated H4f. peptides. The coordinate axis is defined in panel **a**. The conformations from panel **b** are marked using vertical  
579 dotted lines and numbered circles defined in panel **b**. The currents were computed using SEM<sup>42</sup> and were running-averaged with  
580 a 5 Å window. The highlighted region shows the sensing volume ( $-9 \text{ \AA} < z < 15 \text{ \AA}$ ) of the wt-AeL pore<sup>23</sup>. Two black boxes mark the  
581 zoomed in region highlighted in panels **d** and **e**. **d**, Relative residual current versus center of mass z coordinate between  $z=-7 \text{ \AA}$  and  
582  $z=-2 \text{ \AA}$  as highlighted in **c**. The lower panel shows the average relative residual current and its standard error over the 21 data  
583 points in the shown region. The ordering of the peptide currents depends on the peptide conformation. The peptides are arranged  
584 in the x-axis in an increasing order according to their experimental blockade values. **e**, Same as panel **d** but for the region between  
585  $z=0 \text{ \AA}$  to  $z=12.5 \text{ \AA}$  (53 data points), highlighted in **c**.

586

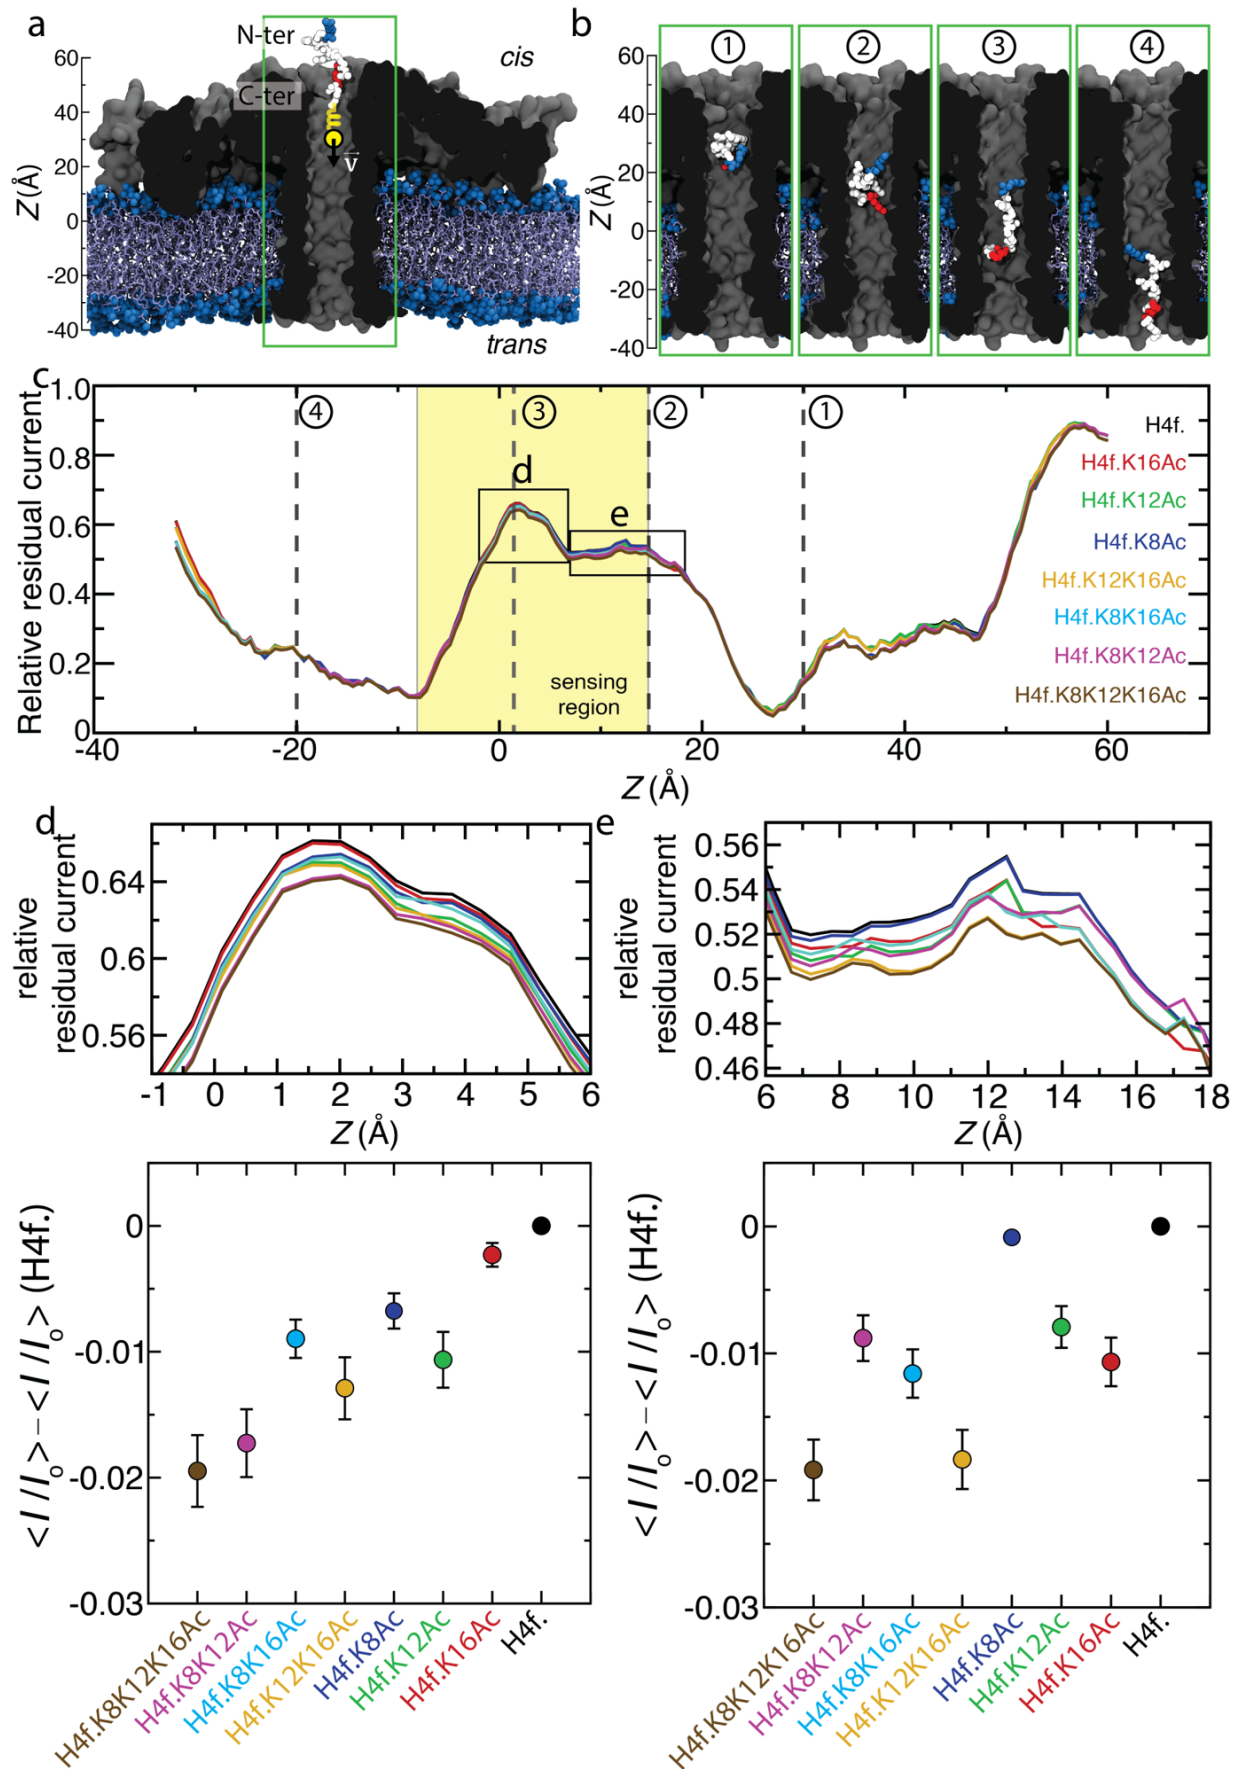

588 **Extended Data Fig. 11 | Blockade current of acetylation modification depends on the global conformation of the peptide in the**  
 589 **nanopore.** **a**, Initial state of a 100 ns steered molecular dynamics simulation where an H4f.K8Ac peptide (vdW spheres) is pulled  
 590 using a harmonic spring with a constant velocity of 1 Å/ns through an aerolysin nanopore (cutaway molecular surface), embedded  
 591 in a lipid membrane (blue) and submerged in 2 M KCl electrolyte (not shown). The C-terminus of the peptide is oriented towards  
 592 the trans-side of the membrane. The global orientation of the peptide is the same as that in the trajectory shown in Fig. 2a, but  
 593 the simulation starts from a slightly different microscopic configuration. The green box shows the nanopore volume shown in panel  
 594 **b**. **b**, Representative conformations of the H4f.K8Ac peptide along the SMD simulation chronologically shown from left to right. **c**,  
 595 Relative residual current versus center of mass z coordinate of the acetylated H4f. peptides. The coordinate axis is defined in panel  
 596 **a**. The conformations from panel **b** are marked using vertical dotted lines and numbered circles defined in panel **b**. The currents  
 597 were computed using SEM<sup>42</sup> and were running-averaged with a 5 Å window. The highlighted region shows the sensing volume (-  
 598 9 Å < z < 15 Å) of the wt-AeL pore<sup>23</sup>. Two black boxes mark the zoomed in region highlighted in panels **d** and **e**. **d**, Relative residual  
 599 current versus center of mass z coordinate between z=-1 Å and z=6 Å as highlighted in **c**. The lower panel shows the average relative  
 600 residual current and its standard error over the 15 data points in the shown region. The ordering of the peptide currents depends  
 601 on the peptide conformation. The peptides are arranged in the x-axis in an increasing order according to their experimental  
 602 blockade values. **e**, Same as panel **d** but for the region between z=6 Å to z=18 Å (24 data points), highlighted in **c**.

603

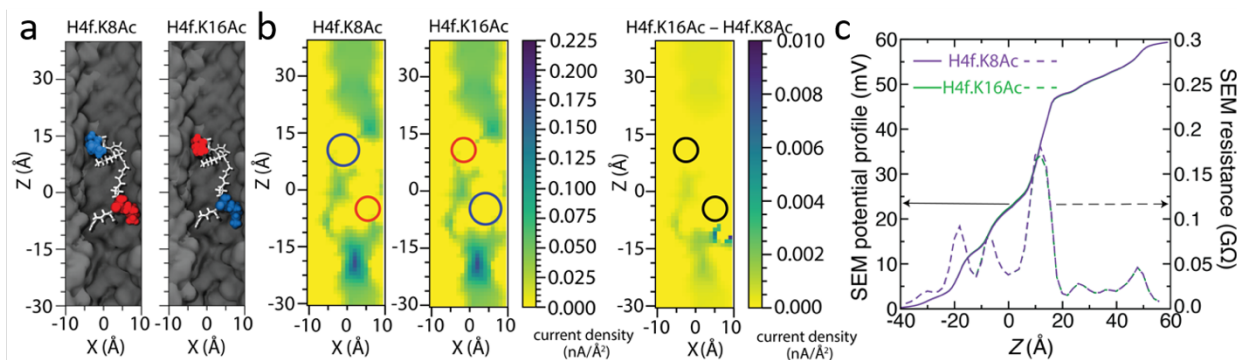

604

605 **Extended Data Fig. 12 | SEM analysis of H4f.K8Ac vs. H4f.K16Ac for another conformation of the H4f. peptide taken from the**  
 606 **same SMD trajectory as that shown in Fig 2 of the main text.** **a**, Representative conformation (z height of 5 Å) of a H4f.K8Ac  
 607 peptide in the sensing region of the nanopore and the corresponding computational model of the H4f.K16Ac peptide. The peptide  
 608 residues are drawn as white sticks except the K8 and K16 residues which are shown as vdW spheres colored according to their  
 609 acetylation state: acetylated (blue) and unmodified (red). **b**, Local density of transmembrane ion current (its z component)  
 610 near the H4f.K8Ac (left) and H4f.K16Ac (center) peptides and their difference (right). The currents were computed using SEM over a 1 Å  
 611 grid. The heat map shows a cross section of the nanopore volume along the pore axis. The circles indicate the approximate locations  
 612 of the K8 and K16 residues. **c**, Electrostatic potential along the nanopore axis for the H4f.K8Ac (purple) and H4f.K16Ac (green)  
 613 peptide systems (solid lines, left axis) and local resistance of the nanopore volume (dashed lines, right axis). The local resistance  
 614 was computed from the local electrostatic potential using 4 Å segments.

615

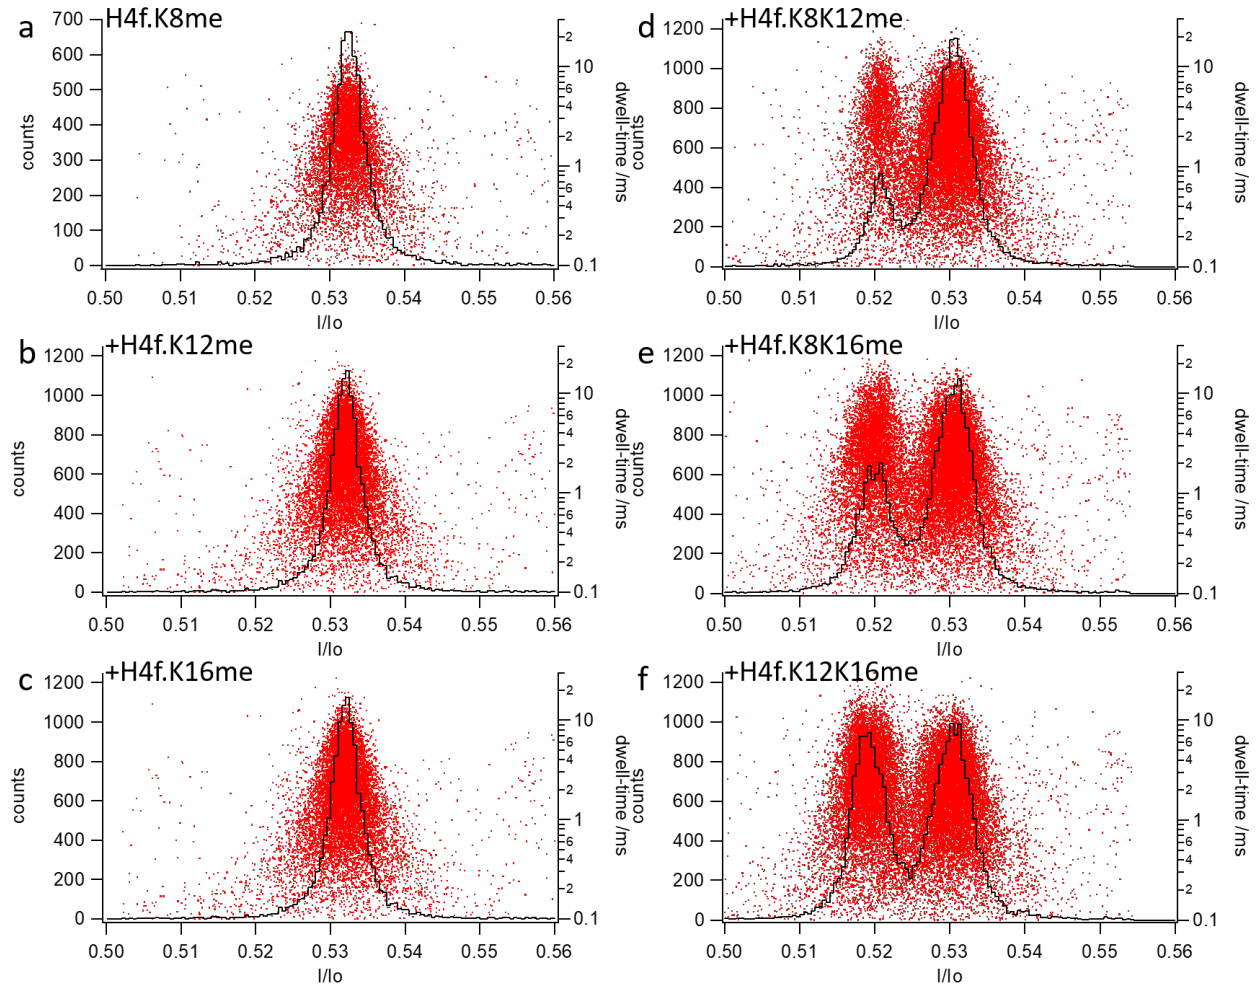

616

617 *Extended Data Fig. 13| Assignment of maxima for singly and doubly monomethylated peptoforms of H4f. using sequentianl*  
618 *addition with the R220S mutant.*

619



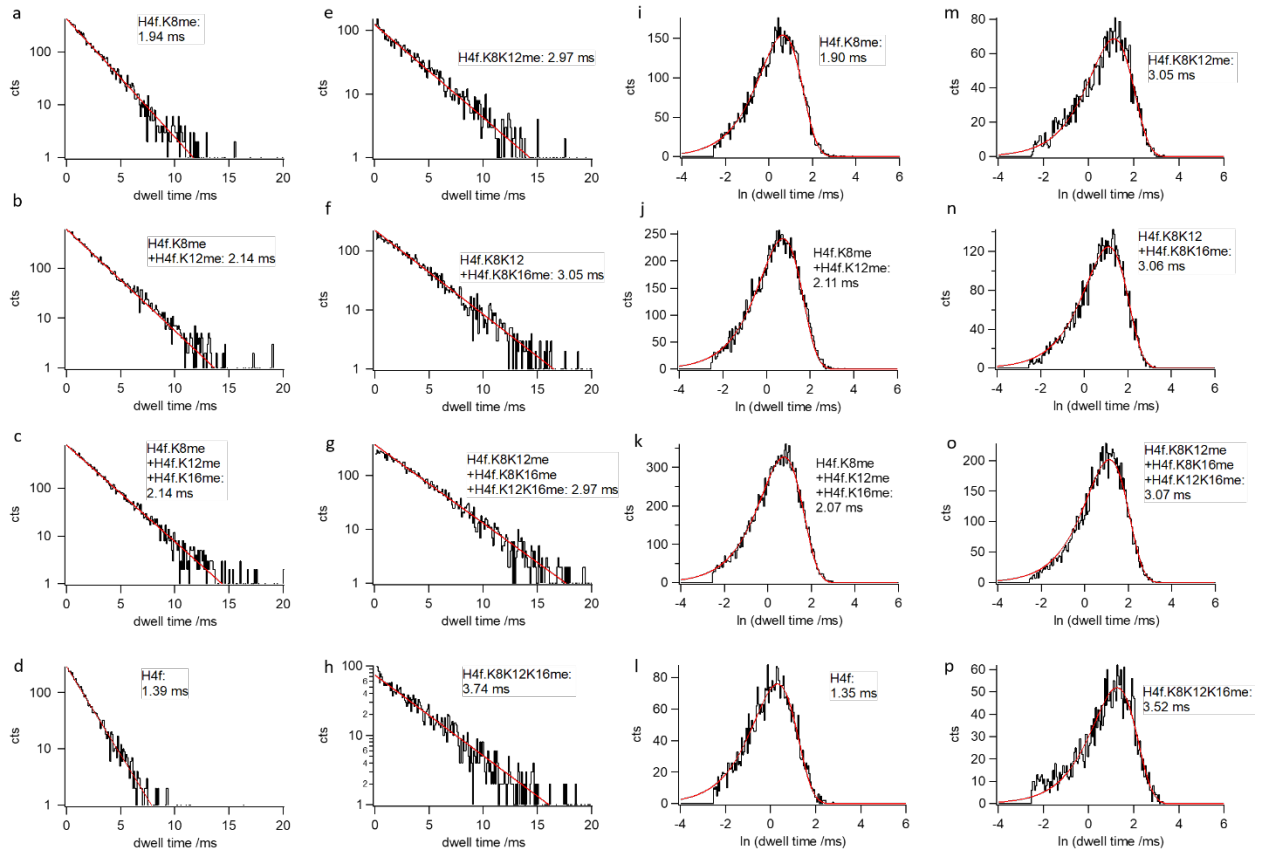

620

621 **Extended Data Fig. 14** | Dwell-time distributions for the interaction of singly, doubly and triply monomethylated peptofoms of H4f  
622 with the R220S mutant.

623

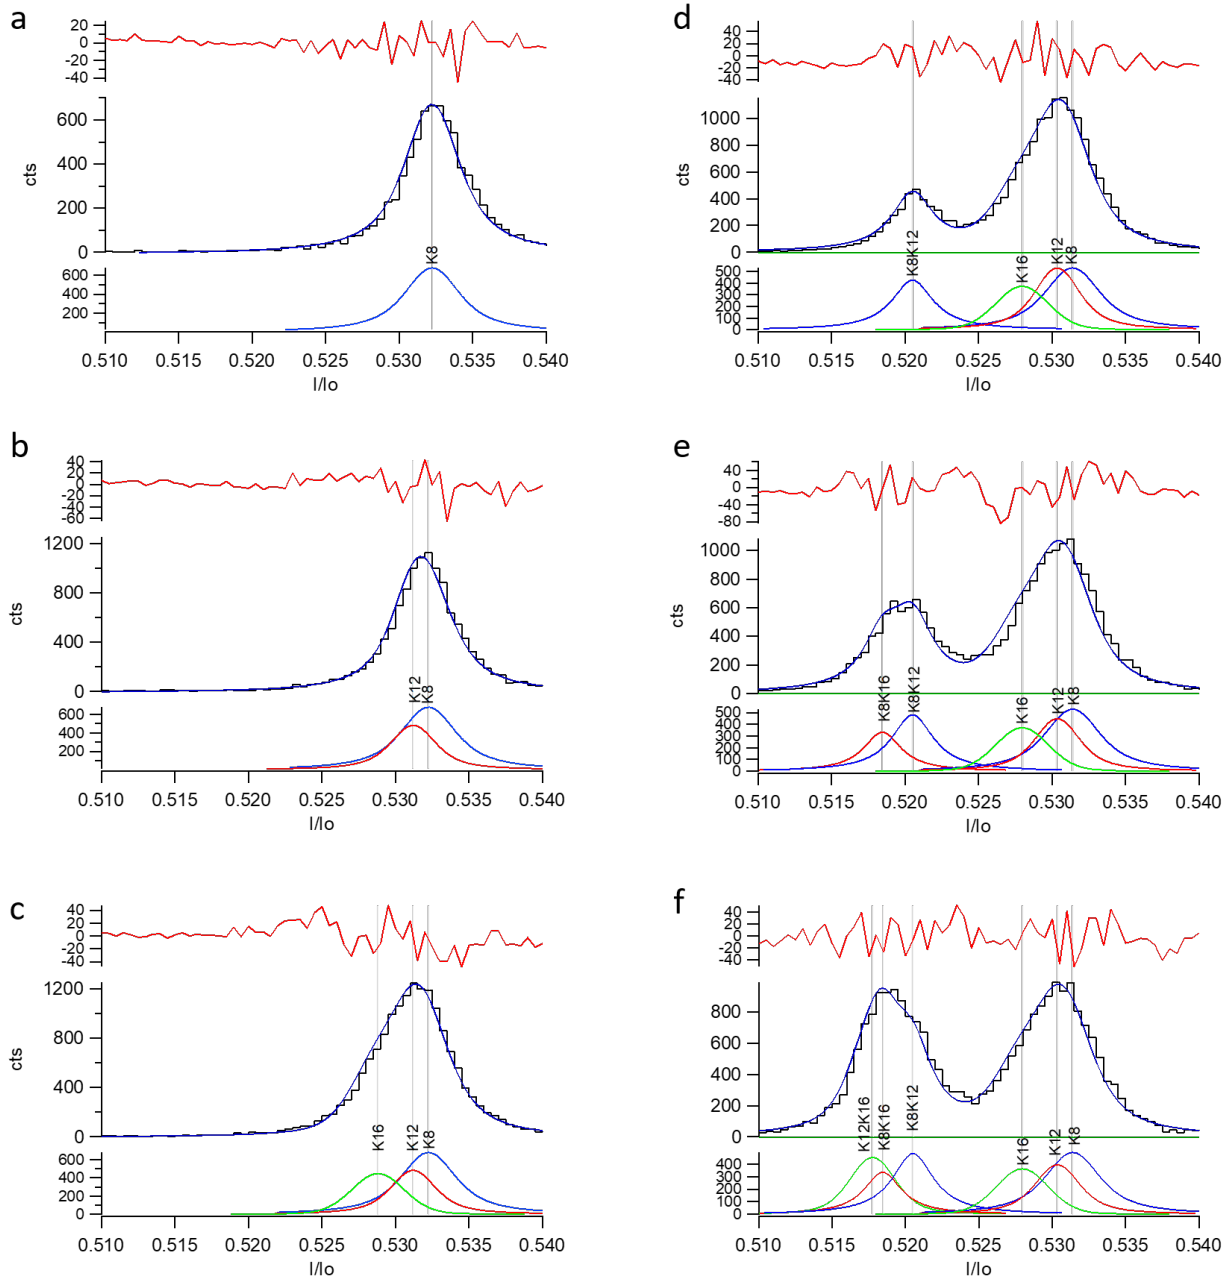

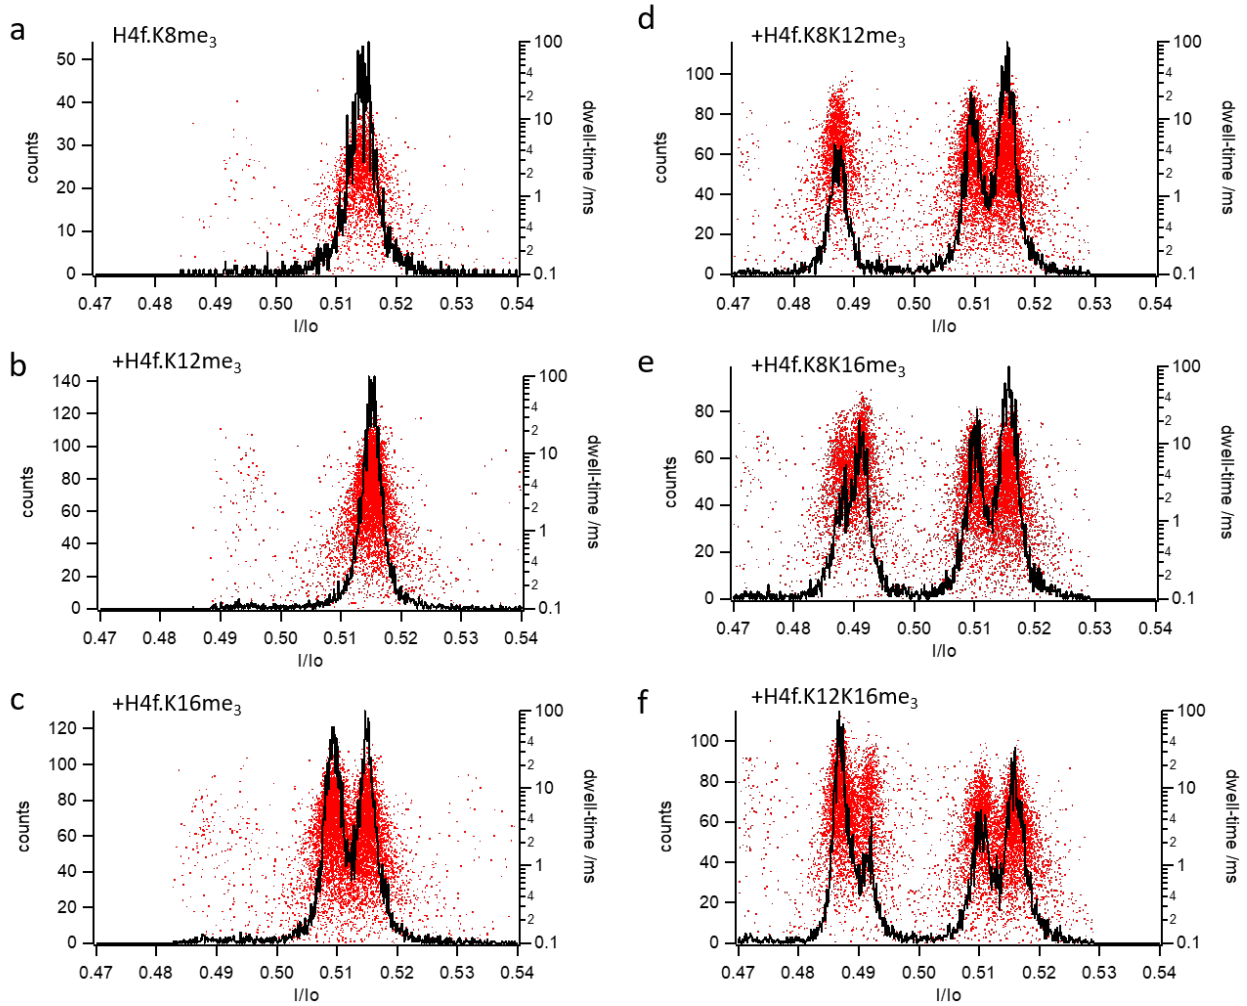

628

629 *Extended Data Fig. 16* | Assignment of maxima for singly and doubly trimethylated peptoforms of H4f, using sequential addition  
630 with the R220S mutant.

631 <

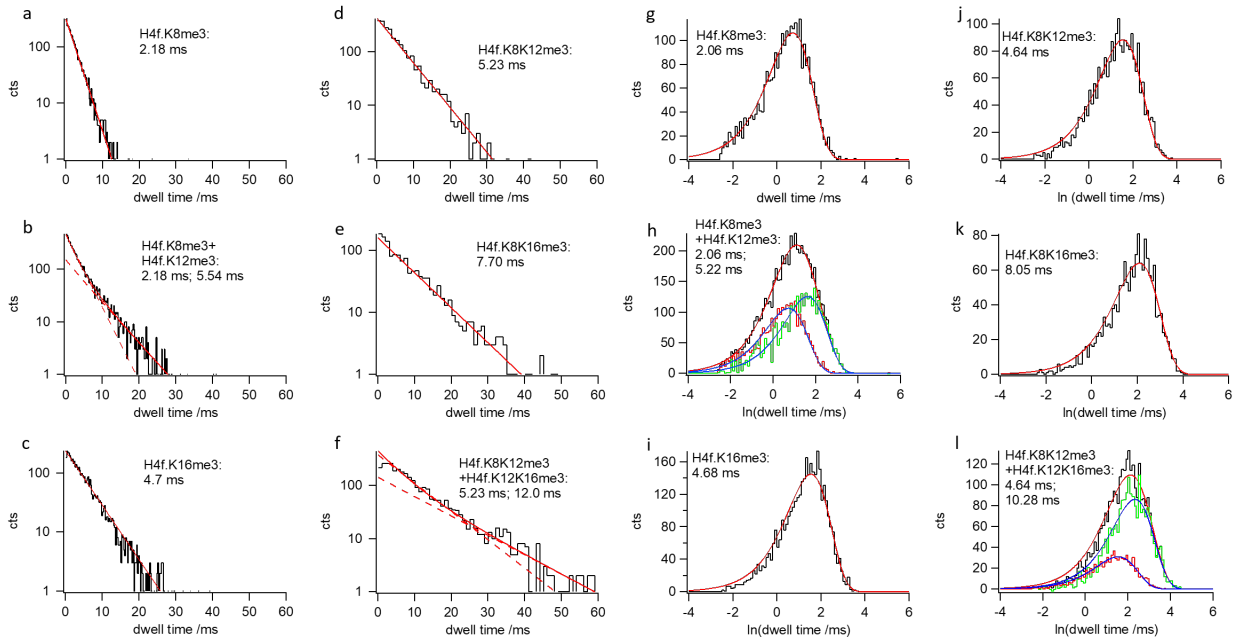

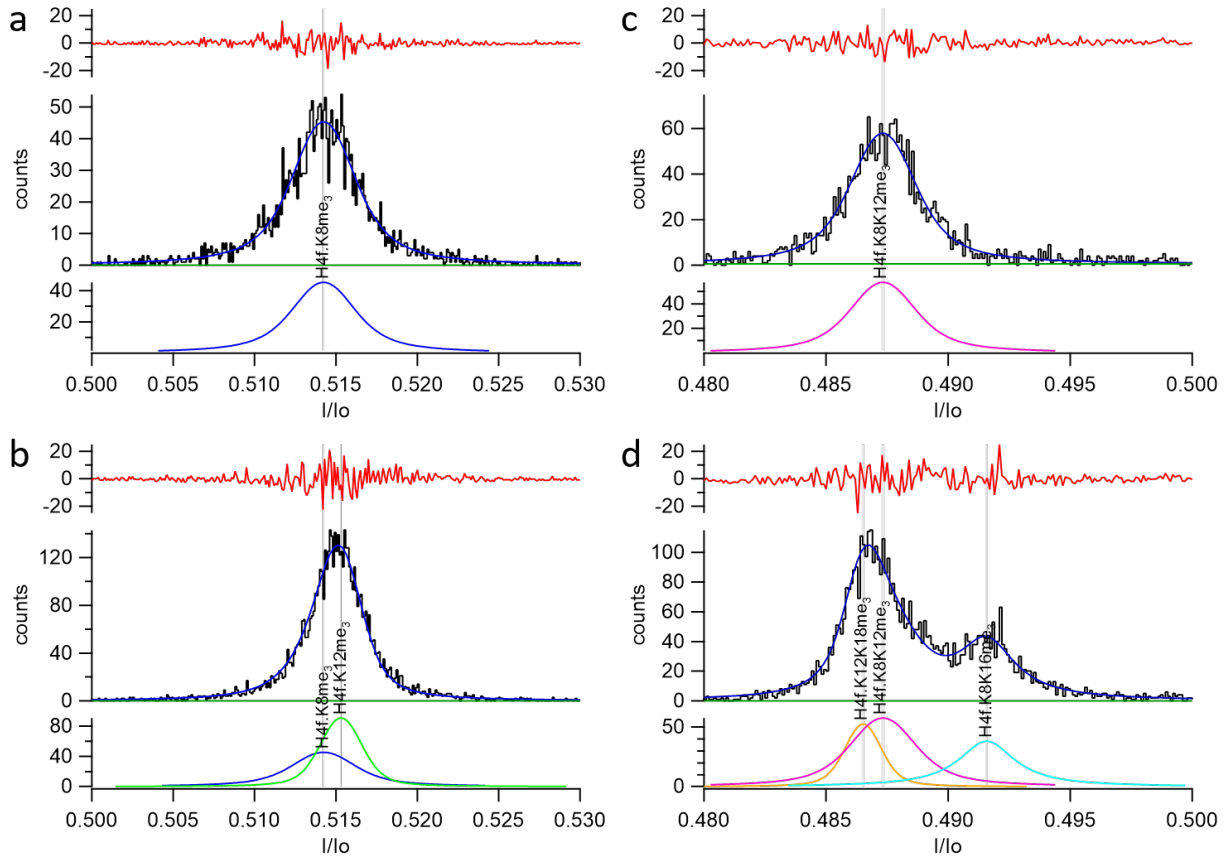

636

637 **Extended Data Fig. 18** | Discrimination of singly (a-c) and doubly (d-f) trimethylated isomeric H4f. peptoforms with the R220S  
638 mutant.

639

WT:

$$Ac: \begin{matrix} K8 \\ K12 < \\ K16 \end{matrix} < \begin{matrix} K8 \\ K12 < \\ K16 \end{matrix} < \begin{matrix} K8 \\ K16 < \\ K16 \end{matrix} < \begin{matrix} K12 \\ K16 < \\ K16 \end{matrix} < K8 < K12 < K16 \ll H4f$$

R220S:

$$Ac: \begin{matrix} K8 \\ K12 \ll \\ K16 \end{matrix} \ll \begin{matrix} K8 \\ K12 \ll \\ K16 \end{matrix} \ll \begin{matrix} K8 \\ K16 \ll \\ K16 \end{matrix} \ll \begin{matrix} K12 \\ K16 \ll \\ K16 \end{matrix} \ll K8 \ll K12 \ll K16 \ll H4f$$

$$me: \begin{matrix} K8 \\ K12 \ll \\ K16 \end{matrix} \ll \begin{matrix} K12 \\ K16 < \\ K16 \end{matrix} < \begin{matrix} K8 \\ K16 < \\ K16 \end{matrix} < \begin{matrix} K8 \\ K12 \ll \\ K12 \end{matrix} \ll K16 < K12 < K8 \ll H4f$$

$$me_3: \begin{matrix} K8 \\ K12 \ll \\ K16 \end{matrix} \ll \begin{matrix} K12 \\ K16 < \\ K16 \end{matrix} < \begin{matrix} K8 \\ K12 \ll \\ K12 \end{matrix} \ll \begin{matrix} K8 \\ K16 \ll \\ K16 \end{matrix} \ll K16 \ll K8 < K12 \ll H4f$$

640

641 *Extended Data Fig. 19| Overview of the sequences of depth of block (I/Io) observed in this study.*

642

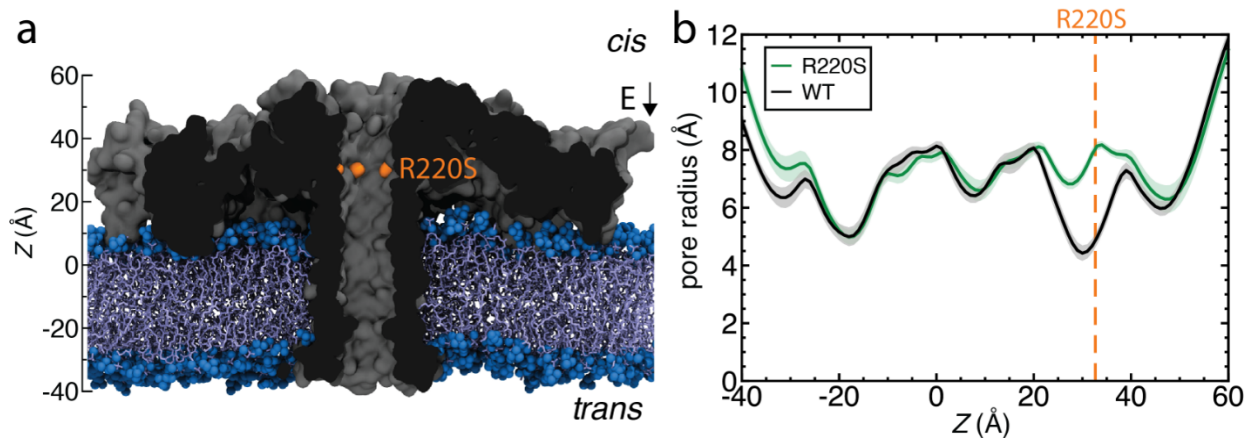

643

644 *Extended Data Fig. 20| Structure of R220S mutant aerolysin. a, Initial state of an MD simulation where a R220S aerolysin*  
 645 *nanopore (cutaway molecular surface) is embedded in a lipid membrane (blue), submerged in 2 M KCl electrolyte (not shown) and*  
 646 *simulated under an applied electric field corresponding to a transmembrane voltage bias of -60 mV, as used experimentally in this*  
 647 *study Residue R220 is shown in orange. b, Pore radius of the R220S pore (green) and the wt-AeL pore (black)<sup>23</sup> is plotted along the*  
 648 *symmetry axis of the pore. The radius is calculated by using the HOLE software and averaged over the last 20 ns of the MD*  
 649 *simulation trajectory for R220S and wt-AeL nanopore.*

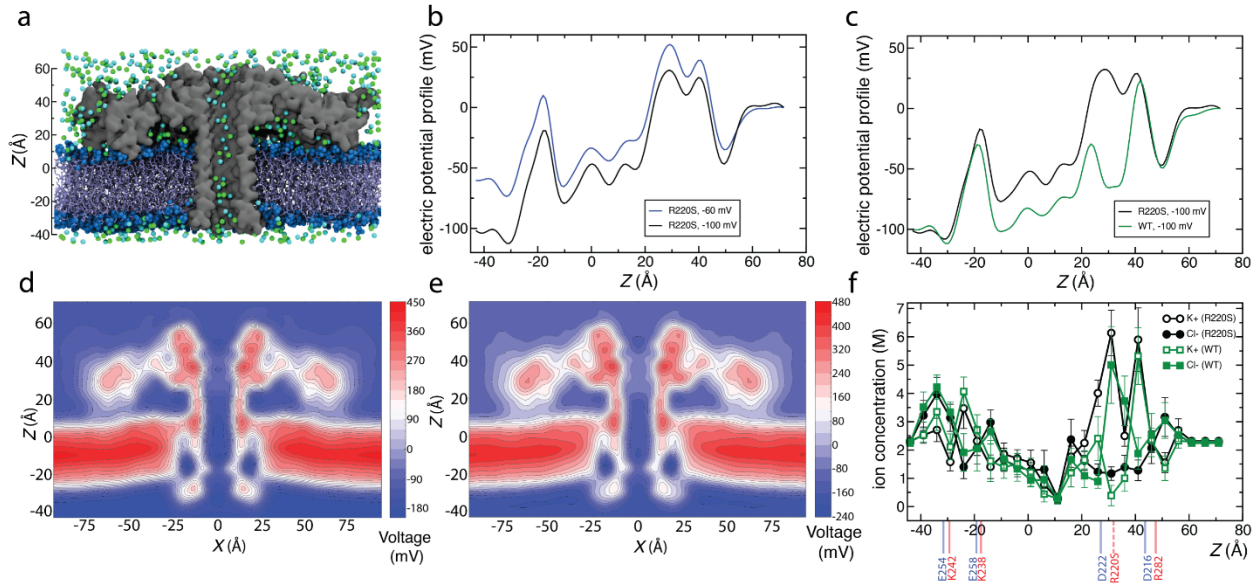

650

651 **Extended Data Fig. 21 | Ion transport driven by electric field through R220S and wt-AeL nanopore.** **a**, Initial state of an MD  
 652 simulation where a R220S aerolysin nanopore (gray cutaway molecular surface) is embedded in a lipid membrane (blue),  
 653 submerged in 2 M KCl electrolyte (potassium and chloride shown as cyan and green spheres respectively) and simulated under an  
 654 applied electric field corresponding to a transmembrane voltage bias of -60 mV, as used experimentally in this study. **b**, average  
 655 electrostatic potential along the symmetry axis of R220S aerolysin (the z axis) at -60 mV (blue) and -100 mV (black). The plot was  
 656 obtained by taking the average of instantaneous values of electrostatic potential along the symmetry axis over a 70 ns (R220S)  
 657 and a 90 ns (wt) MD trajectory; **c**: average electrostatic potential along the symmetry axis of R220S aerolysin (the z axis) at  
 658 -100 mV (black) and wt-AeL at -100 mV and 2 M KCl electrolyte (green). The plot of R220S and wt-AeL was obtained by taking the  
 659 average of instantaneous values of electrostatic potential along the symmetry axis over a 70 ns and 90 ns MD trajectory  
 660 respectively. The average MD current is -0.13 nA at -100 mV for the wt-AeL pore and -0.21 nA at -100 mV for the R220S aerolysin  
 661 pore. **d, e**, Two-dimensional electrostatic potential map of R220S aerolysin at -60 mV (**d**) and -100 mV (**e**) transmembrane bias.  
 662 The map was obtained by averaging instantaneous distributions of electrostatic potentials over a 70 ns (R220S) and 90 ns (wt) MD  
 663 trajectory and the sixfold symmetry of the channel. **f**, profiles of potassium (black, open circles) and chloride (black, filled circles)  
 664 ion concentration along the symmetry axis of the R220S aerolysin nanopore. Also shown are the profiles of potassium (green, open  
 665 squares) and chloride (green, filled squares) ion concentration along the symmetry axis of the wt-AeL nanopore. The ion  
 666 concentration values are averaged over 5 Å z bins inside the pore (defined by the radius profile shown in **Extended Data Fig. 20b**)  
 667 every 0.25 ns and further block averaged over 10 ns intervals in a total simulation time of 70 and 90 ns for the R220S and wt-AeL  
 668 nanopore respectively. The ion concentration for z values outside the protein are calculated by counting the potassium and chloride  
 669 ions in water molecules outside the protein that constitute the bulk water in the simulation system. Background blue and red lines  
 670 represent positive and negative amino acid residues along the inner surface of the aerolysin pore, which are annotated by the  
 671 amino acid type and residue number at the bottom. The dashed blue line represents the R220 positive amino acid that is mutated  
 672 to a neutral serine in the R220S aerolysin pore.

673
